# Supplementary material for: Intercalation of ferrocene into vanadyl phosphate by density functional theory
Source: Royal Society of Chemistry journal article supplement (doi:10.1039/d3ta07097b), 2024-01-01
Supplement: d3ta07097b1.pdf [file d3ta07097b1.pdf]

## Intercalation of Ferrocene into Vanadyl Phosphate by Density Functional Theory

Yuan Liu (刘源)<sup>1</sup>, An T. Ta<sup>1</sup>, R. Seaton Ullberg<sup>1</sup>, Jiahui Liu<sup>2</sup>, Daniel R. Talham<sup>2</sup>  
and Simon R. Phillpot<sup>1\*</sup>

<sup>1</sup>Department of Materials Science and Engineering, University of Florida,  
Gainesville FL 32611 USA

<sup>2</sup>Department of Chemistry, University of Florida, Gainesville FL 32611 USA

To be submitted to ()

### Contents

|                                                                                       |    |
|---------------------------------------------------------------------------------------|----|
| Ferrocene intercalated on the vanadyl phosphate.....                                  | 2  |
| The 17 possibilities of ferrocene intercalated on the vanadyl phosphate.....          | 3  |
| The optimization of 14 structures.....                                                | 9  |
| The optimization of 14 structures parameters in POSCAR file.....                      | 13 |
| The Total Energy comparison.....                                                      | 41 |
| The comparison of Gibbs Free Energy of $E_{\perp}$ -V-45° and $S_{\perp}$ -V-45°..... | 42 |
| The Bader Charge Analysis.....                                                        | 43 |
| The charge density difference maps of eight different configurations.....             | 44 |
| The charge density difference when ferrocene intercalated on P/P site.....            | 45 |
| The 2D charge density difference map of $G_{\perp}$ -P-20° along [001] direction..... | 47 |
| The dihedral angle of ferrocene with and without D3 calculations.....                 | 48 |
| The charge density difference of supercell structure.....                             | 49 |
| The Hirshfeld surface analysis.....                                                   | 50 |
| The other orientation of Hirshfeld surface analysis.....                              | 51 |
| Reference.....                                                                        | 52 |

## Ferrocene intercalated on the vanadyl phosphate.

**Table S1.** The different configurations of ferrocene intercalation into the VOPO<sub>4</sub> layer.

The same color represents the identical configuration.

| V/VO                            | 0°     | 45°         | 90°    |
|---------------------------------|--------|-------------|--------|
| E <sub>⊥</sub> -VO              | Red    | Green       | Red    |
| E <sub>⊥</sub> -V               | Cyan   | Blue        | Cyan   |
| S <sub>⊥</sub> -V               | Yellow | Orange      | Yellow |
| E <sub>∥</sub> -V               | Orange | Light Green | Orange |
| S <sub>∥</sub> -V               | Blue   | Blue        | Blue   |
| P/P                             | 0°     | 45°         | 90°    |
| E <sub>⊥</sub> -P <sub>VO</sub> | Yellow | Dark Blue   | Purple |
| E <sub>⊥</sub> -P <sub>V</sub>  | Purple | Dark Blue   | Yellow |
| S <sub>⊥</sub> -P               | Red    | White       | Red    |
| E <sub>∥</sub> -P               | Purple | Light Blue  | Purple |
| S <sub>∥</sub> -P               | Grey   | Grey        | Grey   |

The 17 possibilities of ferrocene intercalated on the vanadyl phosphate.

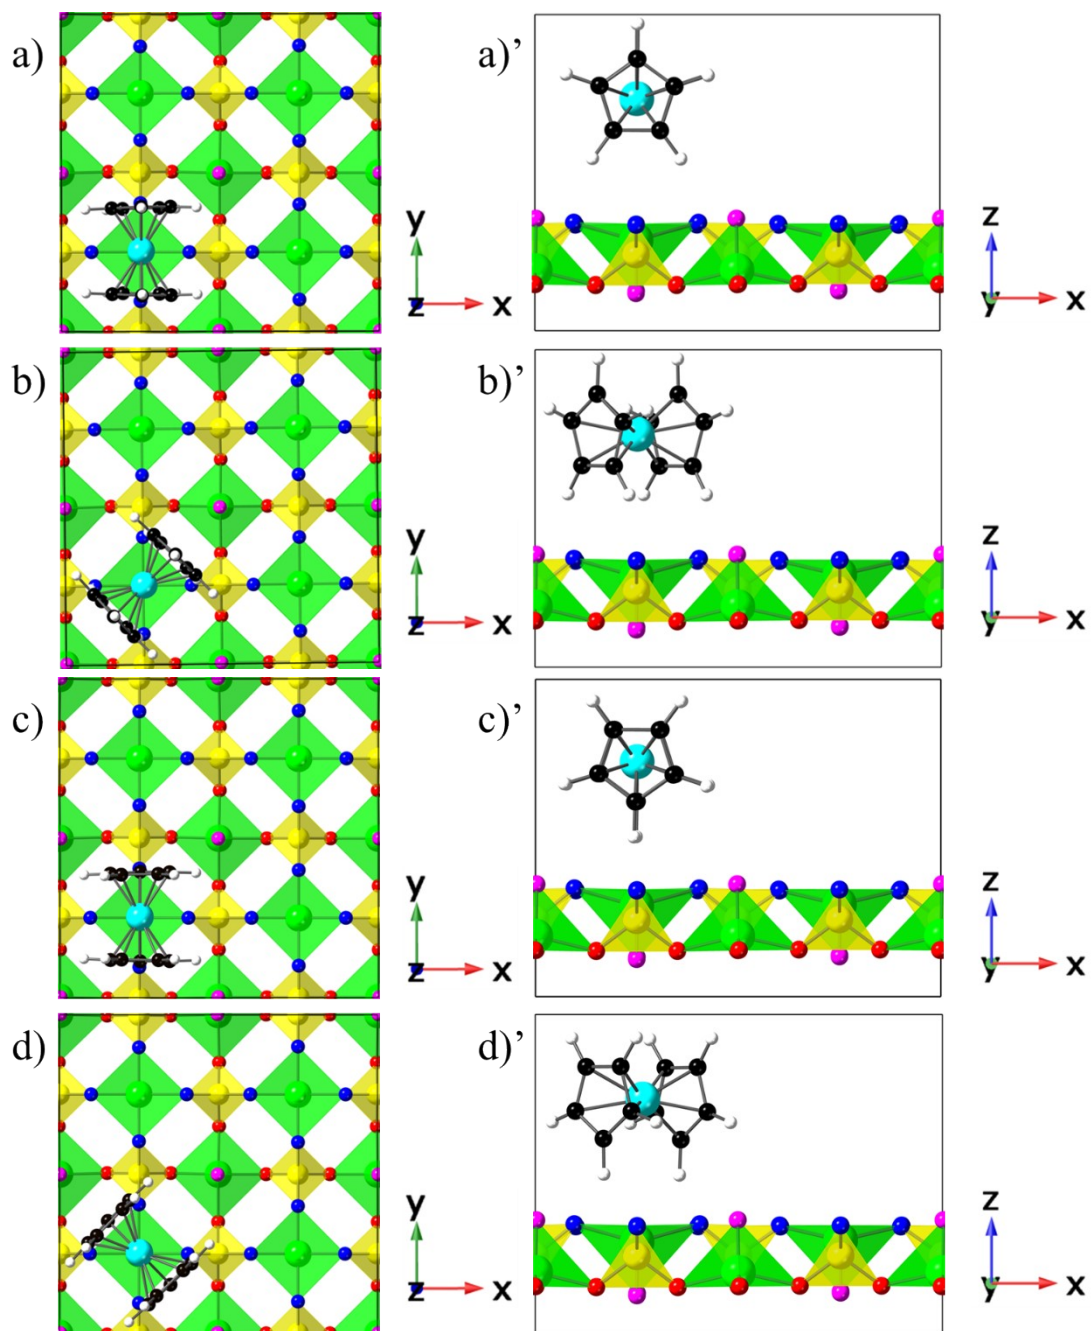

Figure S1. The configurations of a)  $E_{\perp}$ -VO- $0^{\circ}$ , b)  $E_{\perp}$ -VO- $45^{\circ}$ ,  $E_{\perp}$ -V- $0^{\circ}$  and d)  $E_{\perp}$ -V- $45^{\circ}$  are viewed along the [001] direction. The corresponding pictures denoted with prime (') are viewed along the [010] direction. All subsequent configurations are shown in the same directions as these ones. The black box is the unit cell.

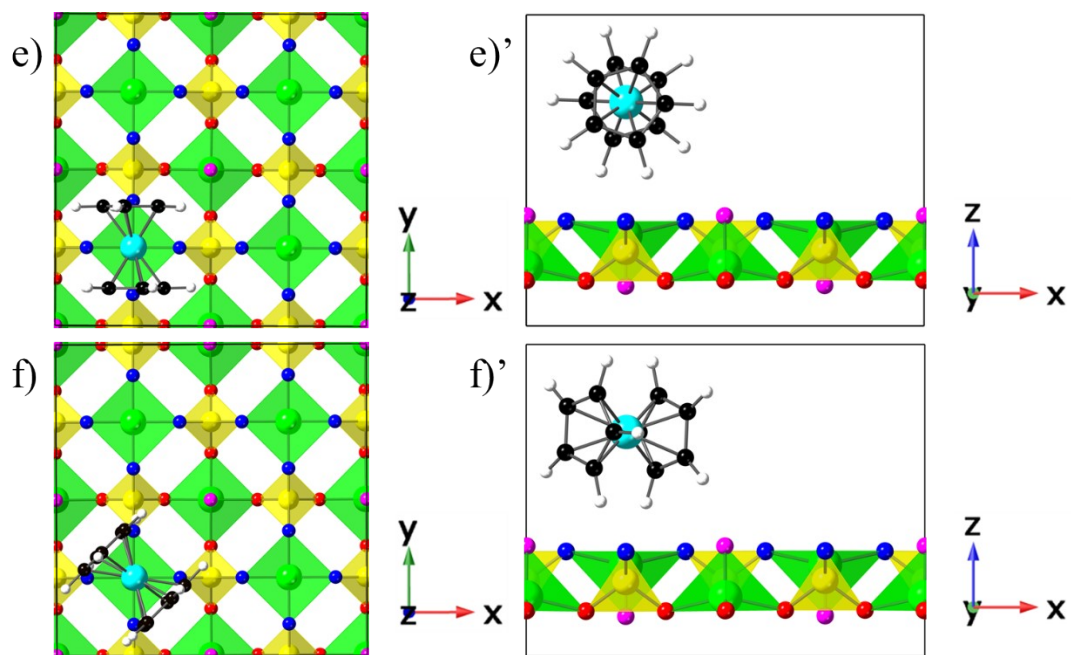

**Figure S1.** The configurations of e)  $S_{\perp}\text{-V-}0^{\circ}$  and f)  $S_{\perp}\text{-V-}45^{\circ}$  are viewed along the  $[001]$  direction. The corresponding pictures denoted with prime (') are viewed along the  $[010]$  direction. The black box is the unit cell.

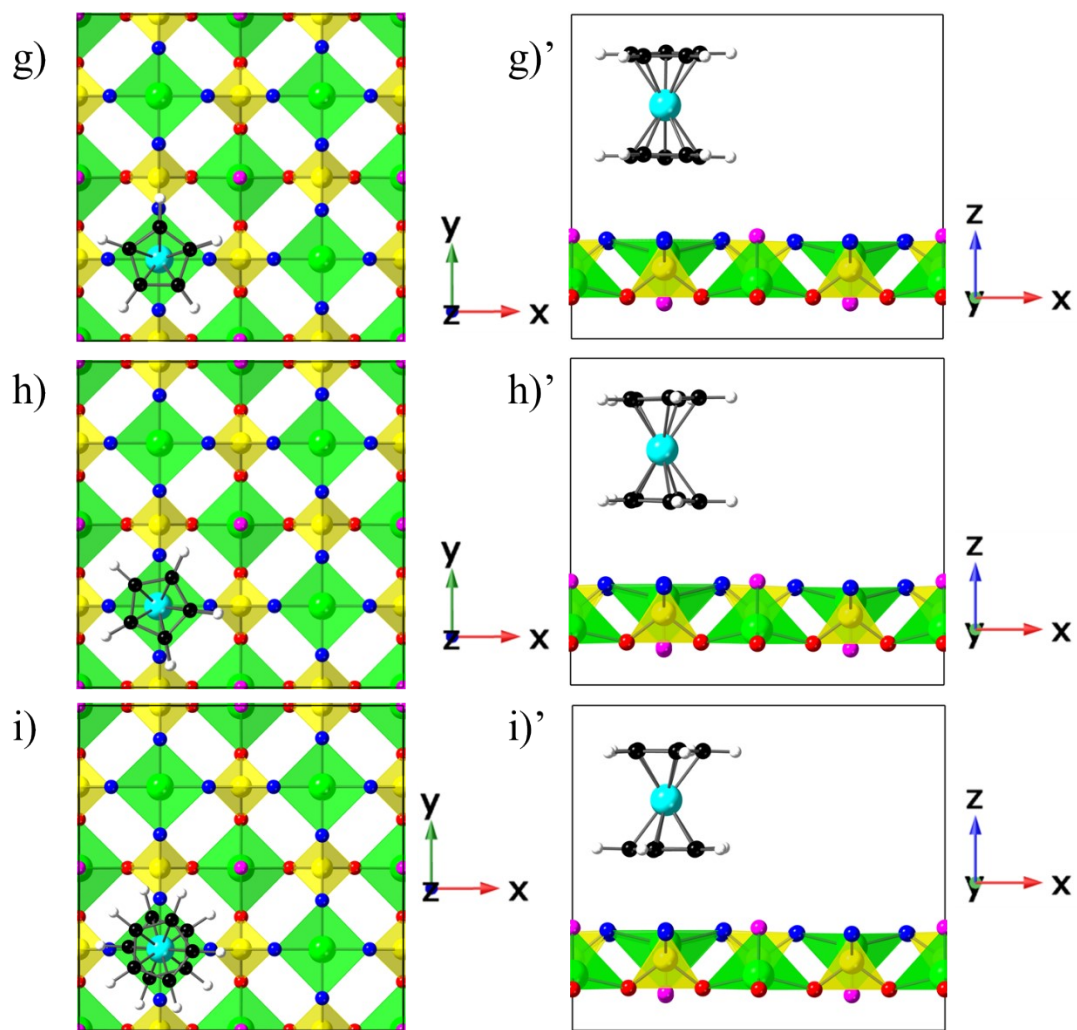

**Figure S1.** The configurations of g)  $E_{\parallel}\text{-V-}0^{\circ}$ , h)  $E_{\parallel}\text{-V-}45^{\circ}$ , and i)  $S_{\parallel}\text{-V-}0^{\circ}$  are viewed along the  $[001]$  direction. The corresponding pictures denoted with prime ( $'$ ) are viewed along the  $[010]$  direction. The black box is the unit cell.

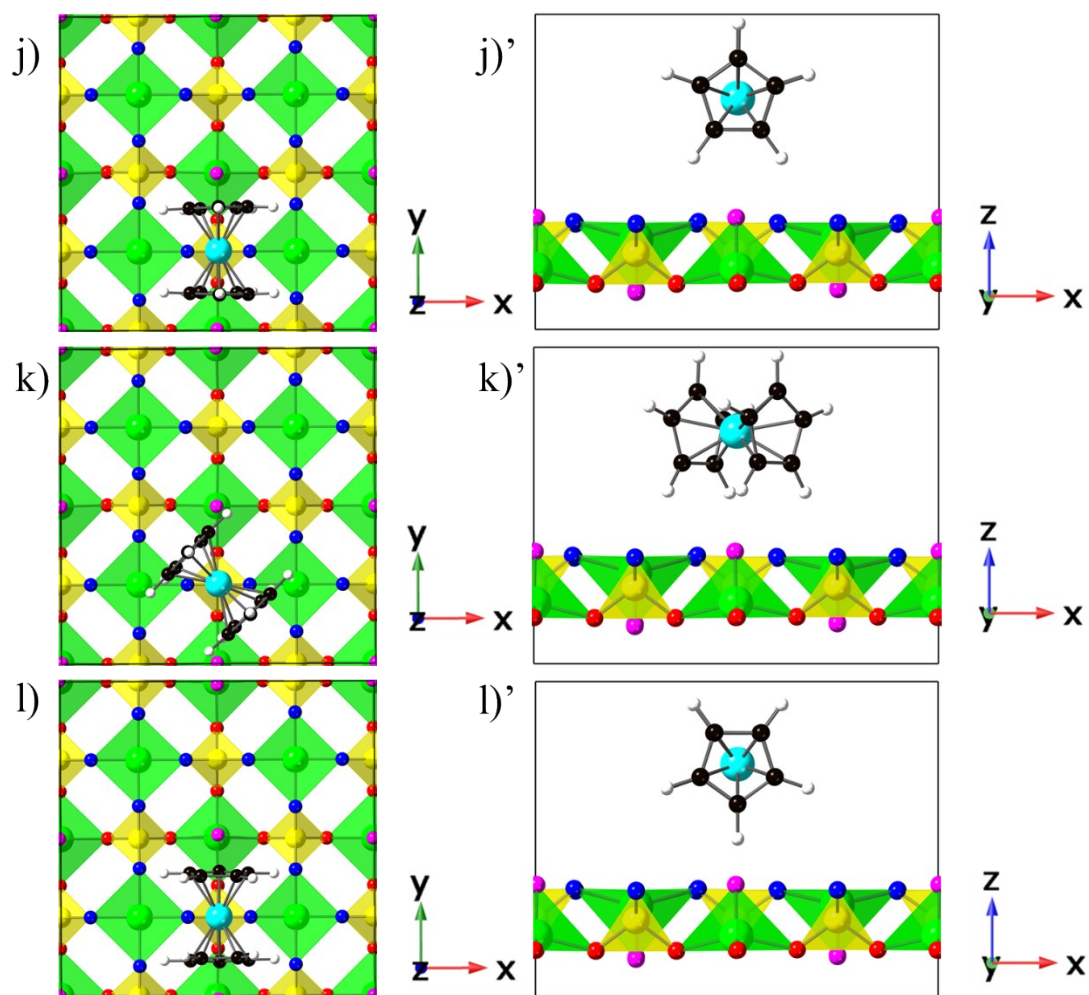

**Figure S1.** The configurations of j)  $E_{\perp}$ -P<sub>VO</sub>-0°, k)  $E_{\perp}$ -P<sub>VO</sub>-45°, and l)  $E_{\perp}$ -P<sub>V</sub>-0° are viewed along the [001] direction. The corresponding pictures denoted with prime (') are viewed along the [010] direction. The black box is the unit cell.



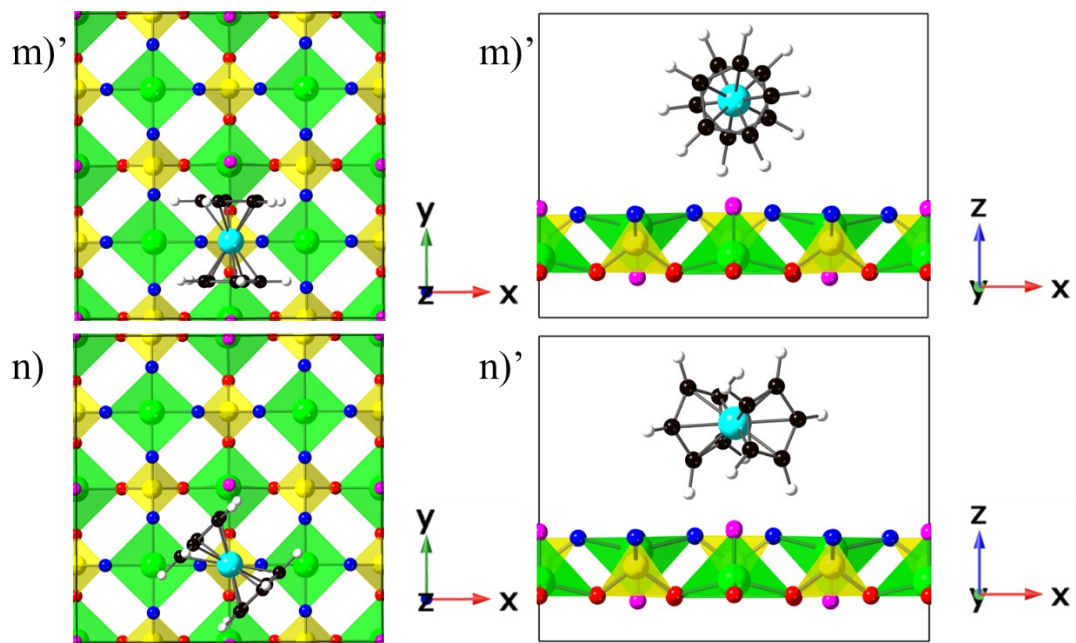

**Figure S1.** The configurations of m)  $S_1$ -P- $0^\circ$  and n)  $S_1$ -P- $45^\circ$  are viewed along the  $[001]$  direction. The corresponding pictures denoted with prime (′) are viewed along the  $[010]$  direction. The black box is the unit cell.

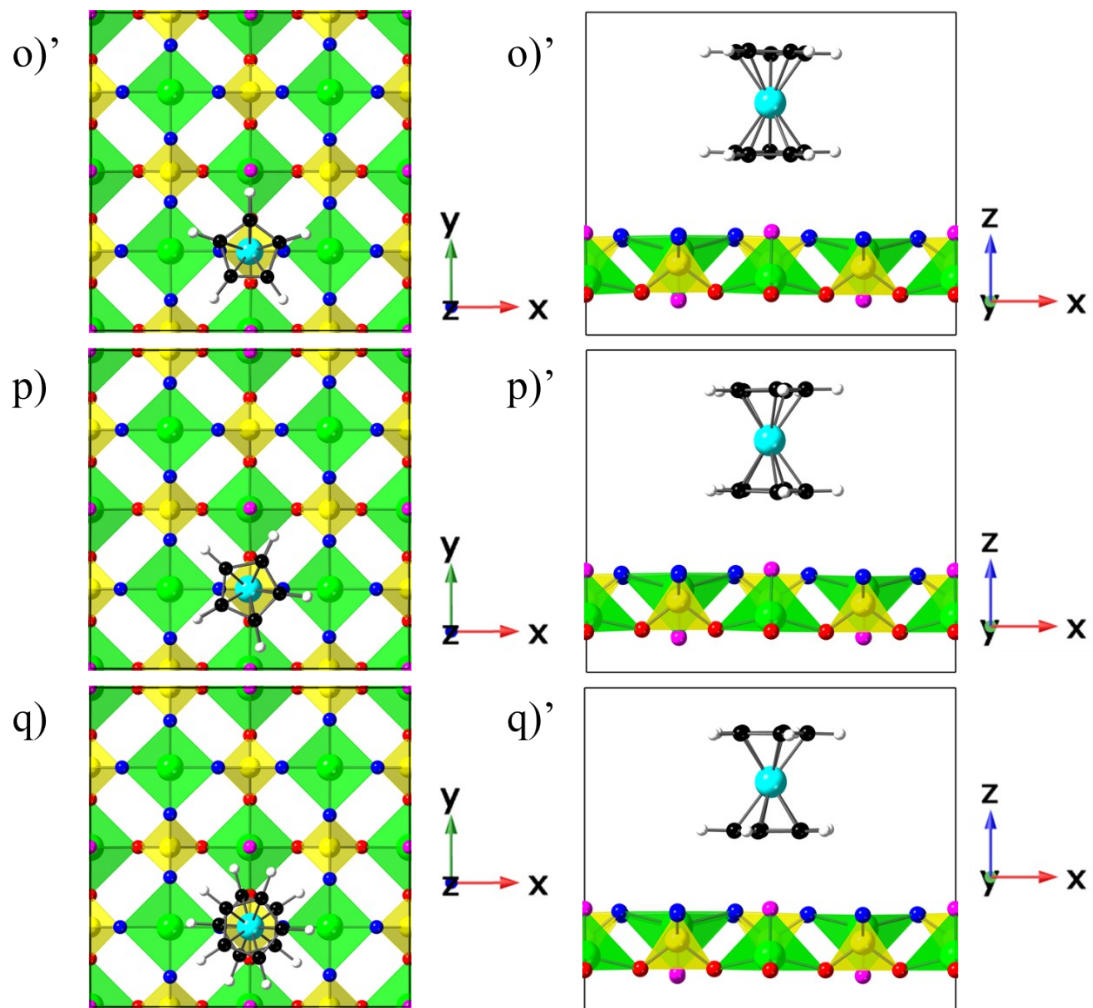

**Figure S1.** The configurations of o)  $E_{\parallel}$ -P- $0^{\circ}$ , p)  $E_{\parallel}$ -P- $45^{\circ}$ , and q)  $S_{\parallel}$ -P- $0^{\circ}$  are viewed along the [001] direction. The corresponding pictures denoted with prime (') are viewed along the [010] direction. The black box is the unit cell.



The optimization of 14 structures.

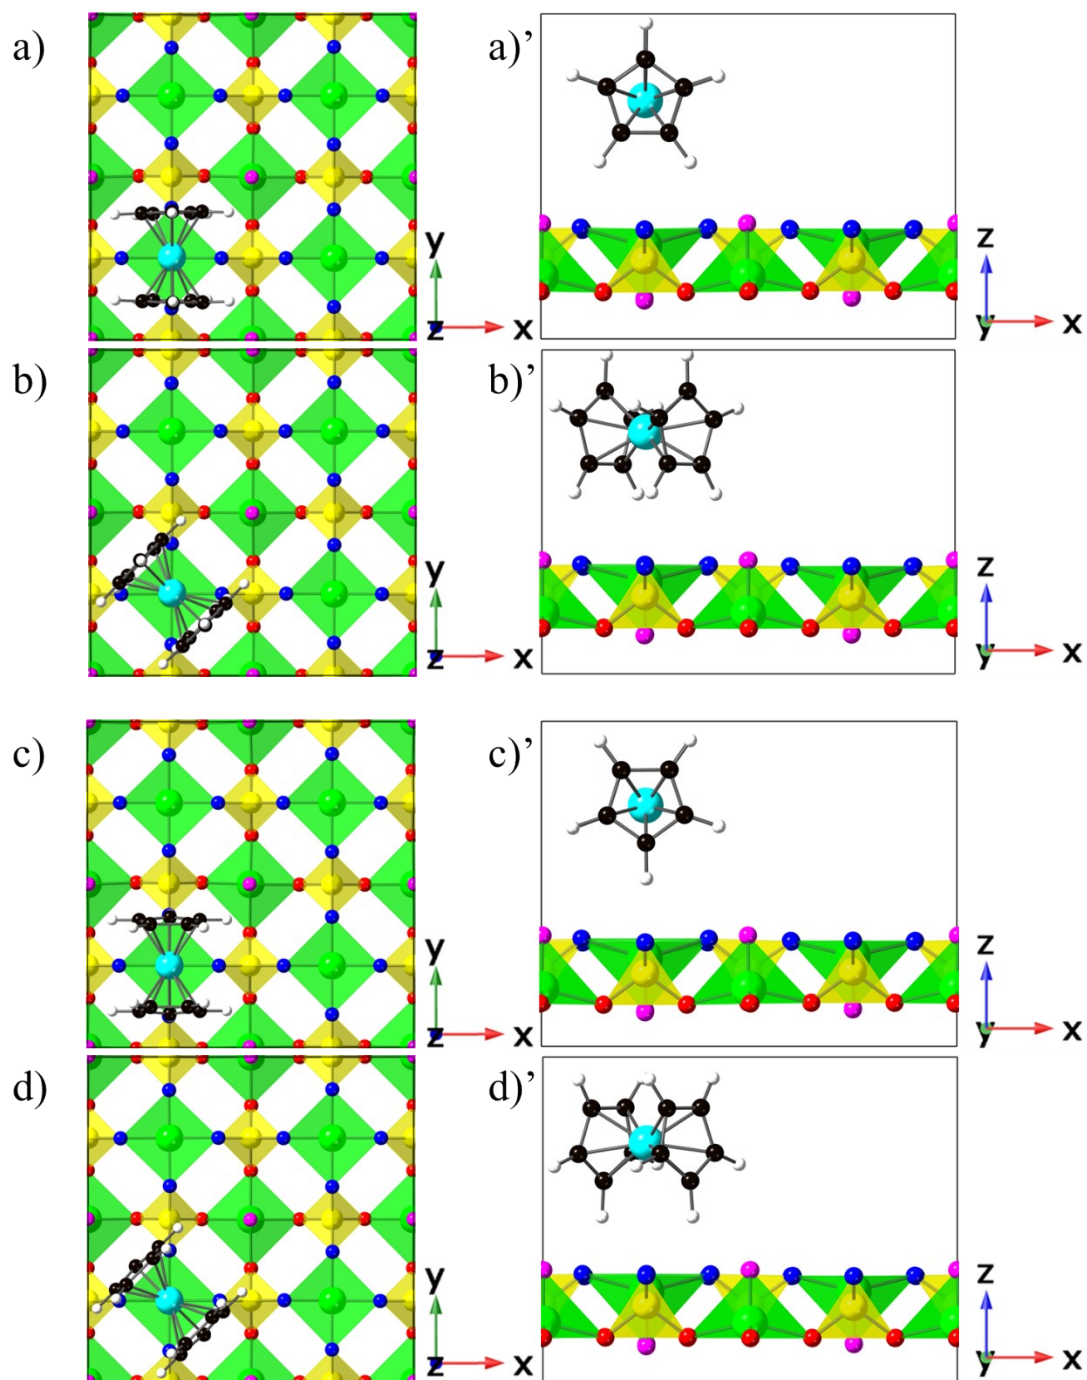

**Figure S2.** The configurations of a)  $E_{\perp}$ -VO-0°, b)  $E_{\perp}$ -VO-45°, c)  $E_{\perp}$ -V-0° and d)  $E_{\perp}$ -V-45° are viewed along the [001] direction. The corresponding pictures denoted with prime (') are viewed along the [010] direction. All subsequent configurations are shown in the same directions as these ones. The black box is the unit cell.

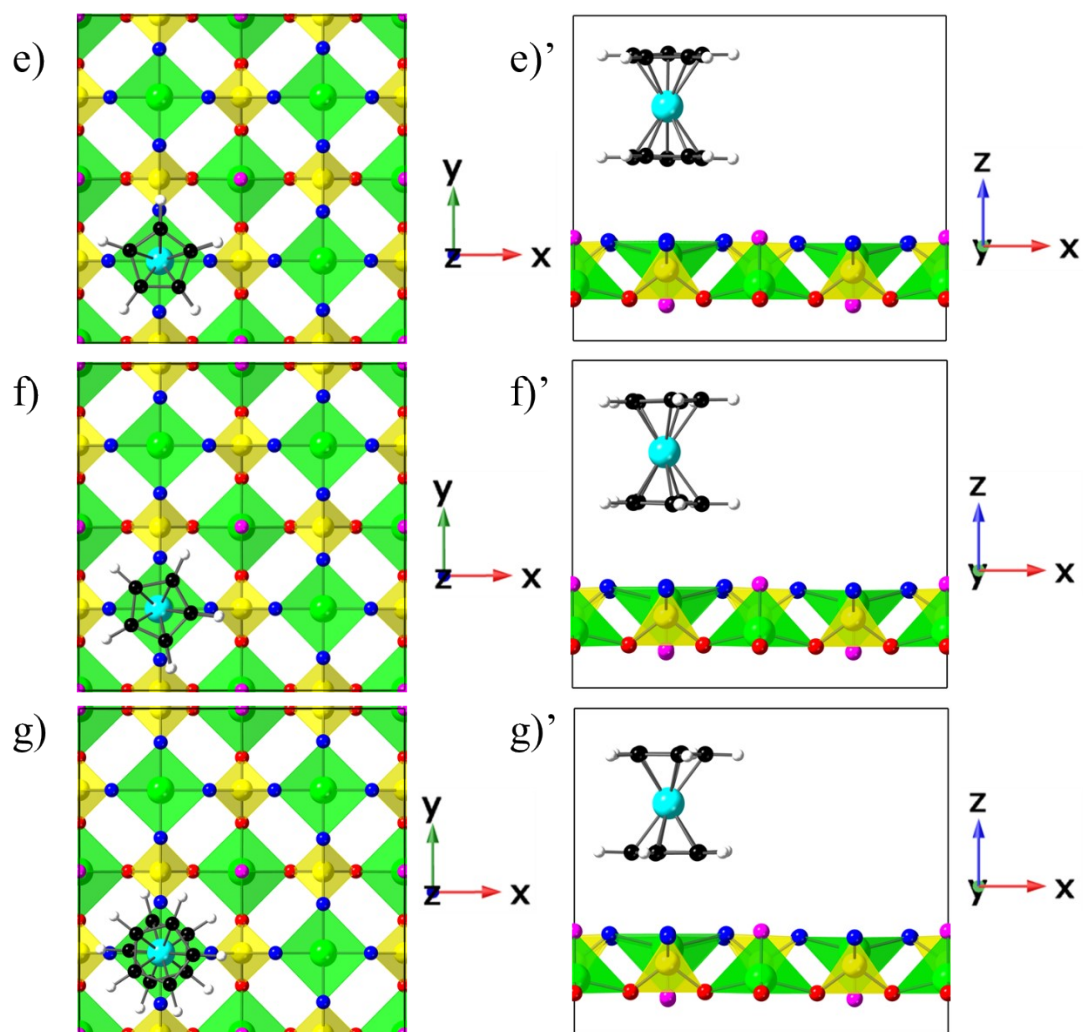

**Figure S2.** The configurations of e)  $E_{\parallel}\text{-V-}0^{\circ}$ , f)  $E_{\parallel}\text{-V-}45^{\circ}$ , and g)  $S_{\parallel}\text{-V-}0^{\circ}$  are viewed along the  $[001]$  direction. The corresponding pictures denoted with prime (') are viewed along the  $[010]$  direction. All subsequent configurations are shown in the same directions as these ones. The black box is the unit cell.

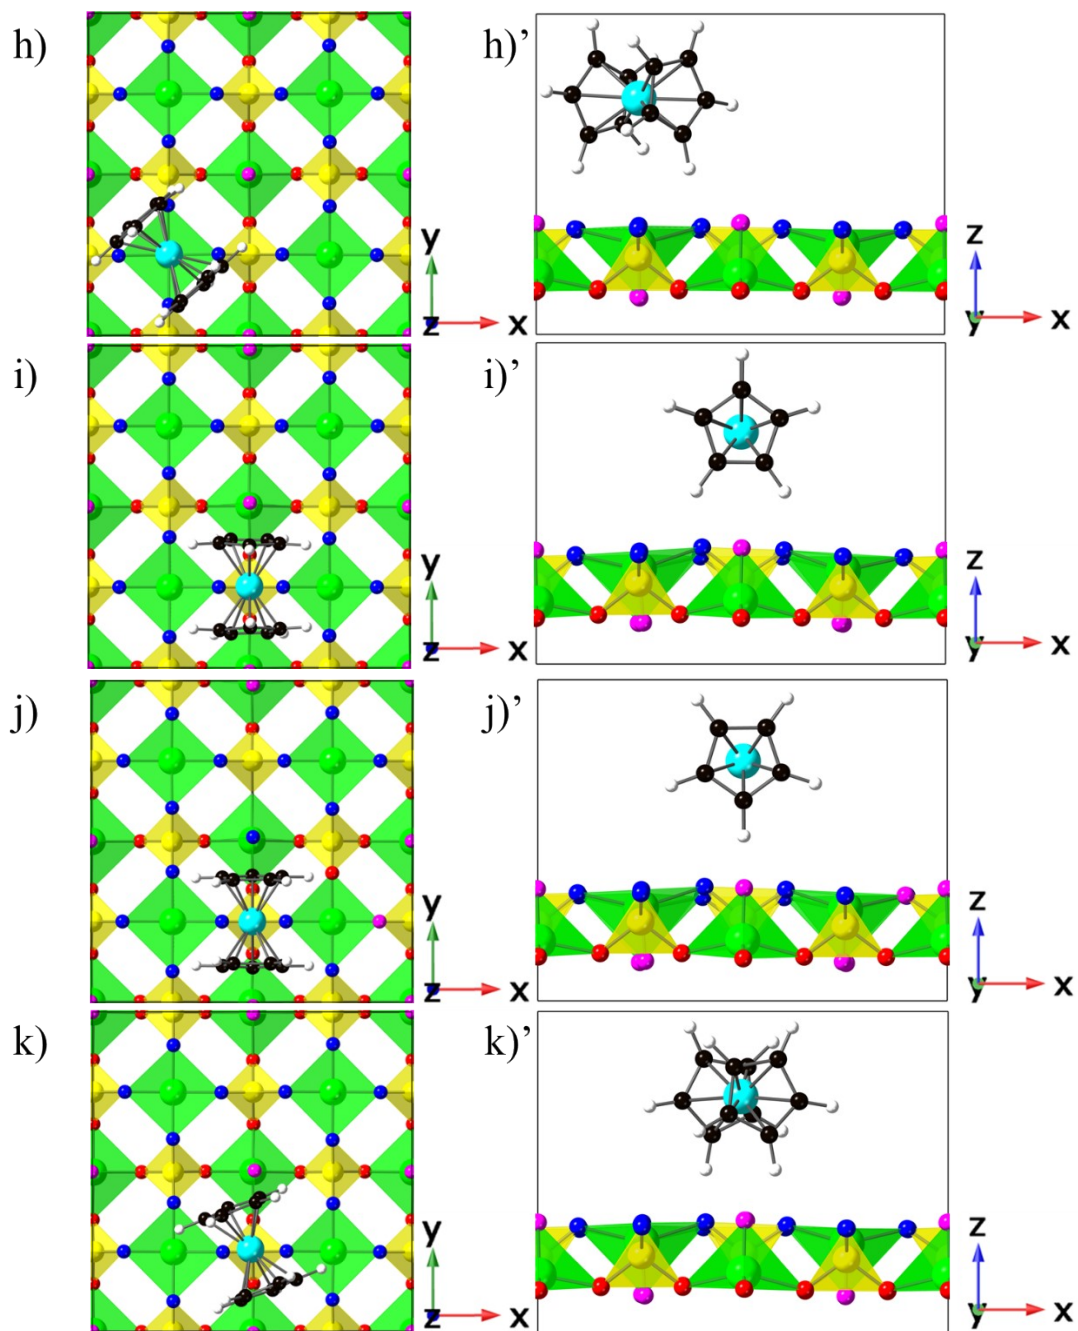

**Figure S2.** The configurations of h)  $S_{\perp}\text{-V-}45^{\circ}$ , i)  $E_{\perp}\text{-P}_{\text{VO}}\text{-}0^{\circ}$ , j)  $E_{\perp}\text{-P}_{\text{V}}\text{-}0^{\circ}$  and k)  $G_{\perp}\text{-P-}20^{\circ}$  are viewed along the [001] direction. The corresponding pictures denoted with prime (') are viewed along the [010] direction. The black box is the unit cell.

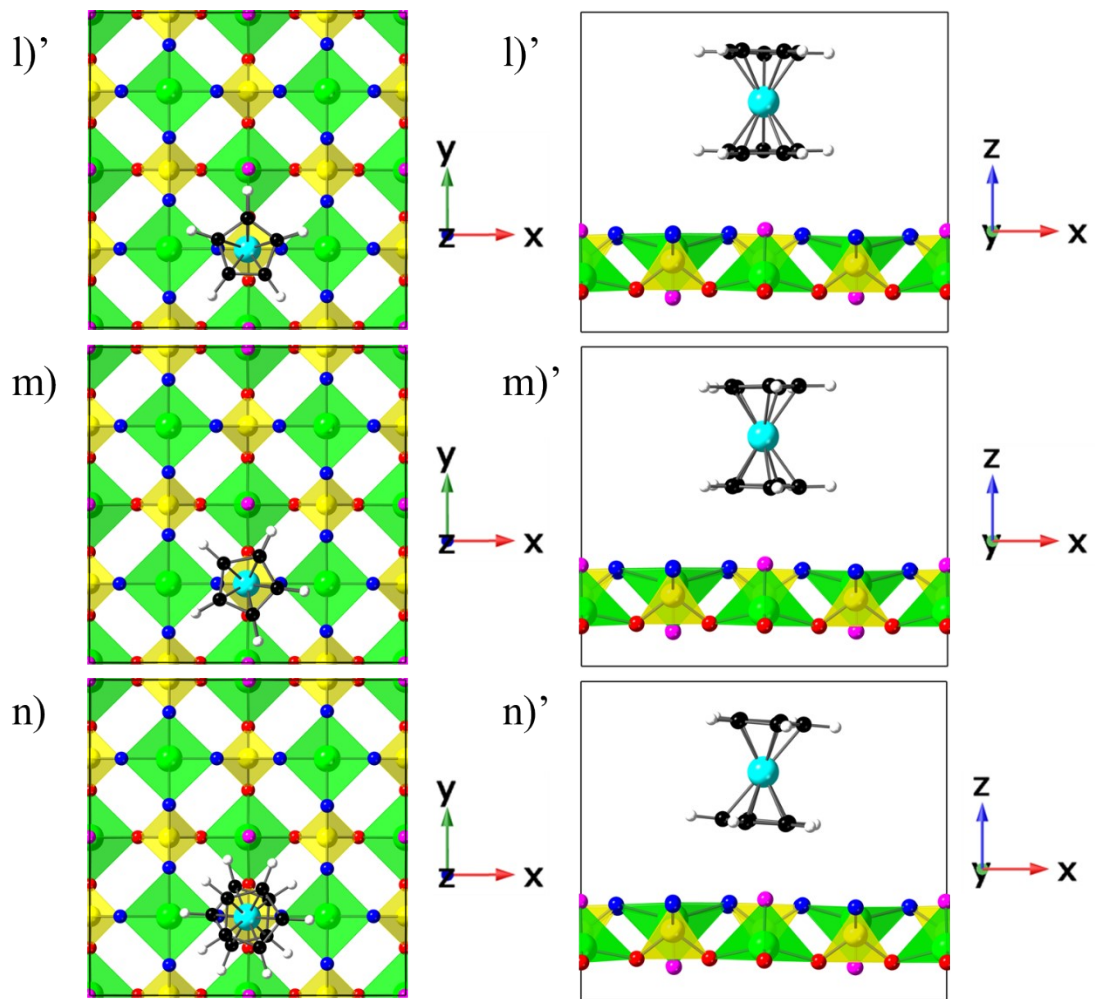

**Figure S2.** The configurations of l)  $E_{||}\text{-P-}0^\circ$ , m)  $E_{||}\text{-P-}45^\circ$ , and n)  $S_{||}\text{-P-}0^\circ$  are viewed along the [001] direction. The corresponding pictures denoted with prime (') are viewed along the [010] direction. The black box is the unit cell.

## The optimization of 14 structures parameters in POSCAR file.

$E_{\perp}$ -VO-0°

```
1.0000000000000000
12.4250515482596473 0.0000000000000000 0.0000000000000000
0.0000000000000000 12.4250515482596473 0.0000000000000000
0.0000000000000000 0.0000000000000000 9.7373736593534339
```

```
O   P   V   C   H   Fe
40  8   8  10  10  1
```

Direct

```
0.2499216494171556 0.0957780136465447 0.3353678369084828
0.2500031721172664 0.6029167923588340 0.3357878852010994
0.7499926458050350 0.1002303986173446 0.3380843640448403
0.7499534078808699 0.6000235131325106 0.3380550071852675
0.4002455277146921 0.7502935256357443 0.3352591396972295
0.4039072621306192 0.2501854083699709 0.3421454721773448
0.8997828824337855 0.7501551036940712 0.3382285570536083
0.8978923345394986 0.2501013804465588 0.3346081183729264
0.2500403009516374 0.7498369630358357 0.1254423376866702
0.2497182972387745 0.2511529924671492 0.1180714349905632
0.7499518909028847 0.7499722441736083 0.1306782923913967
0.7499964883678700 0.2501603417370314 0.1267078569000132
0.0028367981868013 0.0014680996858785 0.3541705170180369
0.0024096875396590 0.4988230099163246 0.3548009791948925
0.4972967890730232 0.0015827873294154 0.3543281652075830
0.4976545231807763 0.4987710692308955 0.3549418865408612
0.0997403197431325 0.7502619823089560 0.3351064427277070
0.0959999908612870 0.2502810543206559 0.3423121744390916
0.6002268553950897 0.7502318582074610 0.3384298275196526
0.6020371080968472 0.2500805967374236 0.3345758233808979
0.2499635725904581 0.8977029135268457 0.3345435954647390
0.2500671257739797 0.4047812375429604 0.3367753522786717
0.7500251718875411 0.9002500484384246 0.3377122433242097
0.7499639605066792 0.3999861958004414 0.3382385280079466
0.9979042900960269 0.8503146080997482 0.1464517020413970
0.0007648358249293 0.3502038707068010 0.1464778200841470
0.5021044950898018 0.8503363221214579 0.1466238111349450
0.4991734244786823 0.3502256396237695 0.1464547776346593
0.1500133728588188 0.9972570689031932 0.1434038496149102
0.1500557702876024 0.5031429057939598 0.1448021069735618
0.6498382569568942 0.0008094712738752 0.1477173402556116
0.6498255174663433 0.4995443427898518 0.1479682927726808
0.3500586404607747 0.9972586425416966 0.1436339358930751
0.3500235388288485 0.5032254020341776 0.1448723086595306
```



|                    |                    |                    |
|--------------------|--------------------|--------------------|
| 0.8501788074228503 | 0.0008189600149273 | 0.1476910679111021 |
| 0.8501482465102377 | 0.4995730724753971 | 0.1479832883986965 |
| 0.0008709851123497 | 0.1502847856314045 | 0.1463304479320963 |
| 0.9979589830812193 | 0.6499211844306930 | 0.1466435924127305 |
| 0.4991383943111998 | 0.1502689587269777 | 0.1462241711792764 |
| 0.5020969448794249 | 0.6499514598779872 | 0.1468473429388274 |
| 0.9991491897577948 | 0.7501853906925859 | 0.2414445342573156 |
| 0.0008748702207693 | 0.2501890505081036 | 0.2437968522594441 |
| 0.5008644889314580 | 0.7502143486578517 | 0.2416598483781564 |
| 0.4990837636829818 | 0.2501741439299524 | 0.2437189298860288 |
| 0.2499585932198813 | 0.9988636103132057 | 0.2406165441342749 |
| 0.2500046887940409 | 0.5016932054086557 | 0.2419964810146834 |
| 0.7500306309190292 | 0.0004883342882278 | 0.2427245210273641 |
| 0.7499935974536791 | 0.4997980461511567 | 0.2430024987529391 |
| 0.0008147347771116 | 0.0007370890982553 | 0.1908392753218633 |
| 0.0007264146015051 | 0.4996071110888745 | 0.1914521686281961 |
| 0.4992633228712628 | 0.0007444815032292 | 0.1909864726679464 |
| 0.4993161705400698 | 0.4996261185652691 | 0.1915812977901645 |
| 0.2499863012461516 | 0.7502535693923444 | 0.2887412426185719 |
| 0.2499202296548808 | 0.2504183060706883 | 0.2844363733682952 |
| 0.7500086604714812 | 0.7501123981232545 | 0.2938410952354035 |
| 0.7499871158296507 | 0.2501153269732719 | 0.2900149625518765 |
| 0.3097755129407862 | 0.1185760851906792 | 0.6333160819288016 |
| 0.1931637068644736 | 0.3863600685577596 | 0.6349770928930338 |
| 0.3456322005945244 | 0.1142466717229405 | 0.7726008133128769 |
| 0.2537186442344908 | 0.1126902153605567 | 0.8593933593258521 |
| 0.1599433755995408 | 0.1174362338132898 | 0.7752338960798285 |
| 0.1939788278281848 | 0.1203470429141037 | 0.6343816030175243 |
| 0.3089489121198023 | 0.3892268057378338 | 0.6350644763601381 |
| 0.3439060909781952 | 0.3931865329855524 | 0.7747576067405888 |
| 0.2514343811499790 | 0.3933448411818255 | 0.8606203496906661 |
| 0.1582438442780878 | 0.3882264747987170 | 0.7754748722096201 |
| 0.4287534544383075 | 0.1167679980139340 | 0.8072047127412041 |
| 0.1420855771863538 | 0.3831557338302856 | 0.5447340678515320 |
| 0.3601257875488291 | 0.3869760726278142 | 0.5448337378942335 |
| 0.4268222044389013 | 0.3913161597090714 | 0.8102081672277065 |
| 0.3604834571788554 | 0.1217969055976661 | 0.5426980023957091 |
| 0.1422455635609726 | 0.1235011600278413 | 0.5447298700967375 |
| 0.2518992723746088 | 0.3893172774829823 | 0.9715572541993084 |
| 0.2548730696703903 | 0.1160477874477476 | 0.9703769295634365 |
| 0.0775141989480925 | 0.1206873184904758 | 0.8122107360924613 |
| 0.0756094258362260 | 0.3839893948524544 | 0.8115343477070054 |
| 0.2516606492572966 | 0.2533761174847806 | 0.7341556172283513 |

**E<sub>⊥</sub>-VO-45°**



|                     |                     |                    |
|---------------------|---------------------|--------------------|
| 1.0000000000000000  |                     |                    |
| 12.4250515482596473 | 0.0000000000000000  | 0.0000000000000000 |
| 0.0000000000000000  | 12.4250515482596473 | 0.0000000000000000 |
| 0.0000000000000000  | 0.0000000000000000  | 9.7373736593534339 |

|    |   |   |    |    |    |
|----|---|---|----|----|----|
| O  | P | V | C  | H  | Fe |
| 40 | 8 | 8 | 10 | 10 | 1  |

Direct

|                     |                    |                    |
|---------------------|--------------------|--------------------|
| 0.2495073841418630  | 0.0952262526165533 | 0.3368983034064097 |
| 0.2511924834000211  | 0.6027073879481272 | 0.3311828395757700 |
| 0.7493874264616222  | 0.1002309725767760 | 0.3304057039873651 |
| 0.7500304764756862  | 0.6005572582214870 | 0.3316121819750940 |
| 0.4003966110473405  | 0.7506537364261099 | 0.3308404849395678 |
| 0.4046649408052868  | 0.2507307056847721 | 0.3351583210124325 |
| 0.9000789322674798  | 0.7506532371383885 | 0.3319194699760192 |
| 0.8972126727274270  | 0.2498001441417520 | 0.3310015802106226 |
| 0.2503100341668908  | 0.7498442005908746 | 0.1209482829215357 |
| 0.2484687379860538  | 0.2492286948984297 | 0.1186222939290811 |
| 0.7503443122131465  | 0.7505495408291103 | 0.1243345137951003 |
| 0.7500002480262412  | 0.2506012030402306 | 0.1208849127627701 |
| 0.0016796302987148  | 0.0018109524726225 | 0.3487911219273202 |
| -0.0002337572244063 | 0.5007635287334706 | 0.3500516922519774 |
| 0.5004443640649553  | 0.0001402438096390 | 0.3497176088899804 |
| 0.4985179258616104  | 0.4985530297387542 | 0.3482703477400547 |
| 0.1000282458038480  | 0.7495019824160133 | 0.3306152244691689 |
| 0.0949813596865340  | 0.2495647866527028 | 0.3372236602282375 |
| 0.6003018407808655  | 0.7502390590863687 | 0.3315600141100631 |
| 0.6025186193282153  | 0.2512781297922240 | 0.3308220190973511 |
| 0.2495003985231342  | 0.8974577455243333 | 0.3305616452931718 |
| 0.2504183841170664  | 0.4048498880507519 | 0.3357084009842213 |
| 0.7503269055812261  | 0.9003004067620962 | 0.3319171992506645 |
| 0.7502937017606516  | 0.4006471973068177 | 0.3307778138574815 |
| -0.0000073600967928 | 0.8507797511432821 | 0.1413017582782669 |
| 0.9992037432930057  | 0.3506543297411667 | 0.1430616023809377 |
| 0.5007826103440760  | 0.8501835860732208 | 0.1407141628303172 |
| 0.5009434596126652  | 0.3497632572378294 | 0.1397554128585969 |
| 0.1506714560872691  | 0.9997378358949967 | 0.1405366655919186 |
| 0.1497563220882090  | 0.5021212004306209 | 0.1426822190403349 |
| 0.6502712584039387  | 0.9990377007650927 | 0.1405896574749095 |
| 0.6496924263600685  | 0.5007792962546116 | 0.1410052951591656 |
| 0.3504200366945601  | 0.9994532902296964 | 0.1426194609864778 |
| 0.3495163216375598  | 0.5009310177726057 | 0.1401370554325529 |
| 0.8506030514275029  | 0.9999719959462100 | 0.1412363296331148 |
| 0.8499963056448230  | 0.5010348264043541 | 0.1407989071620081 |
| 0.9993021021836808  | 0.1509300123029447 | 0.1408256500262472 |

|                    |                    |                    |
|--------------------|--------------------|--------------------|
| 0.9988579073715074 | 0.6504634014853335 | 0.1407451638387059 |
| 0.5019292730275795 | 0.1499810864684090 | 0.1422022727895582 |
| 0.5003657821542807 | 0.6498904631869049 | 0.1410742851028491 |
| 0.9998808291769776 | 0.7504922047195021 | 0.2360595916561867 |
| 0.9997267103475354 | 0.2501497433331153 | 0.2392203088731412 |
| 0.5003570348587287 | 0.7501156349575596 | 0.2360038061762039 |
| 0.5005040225646864 | 0.2505367071490962 | 0.2381871565288496 |
| 0.2499558144760605 | 0.0000011571887172 | 0.2388495109765113 |
| 0.2503341103821924 | 0.5006421791963546 | 0.2386335252287360 |
| 0.7502758978773743 | 0.0000393386084699 | 0.2359486618736513 |
| 0.7498752617897749 | 0.5006372808034035 | 0.2359929564952429 |
| 0.0010370981503353 | 0.0012410918669769 | 0.1855659547762181 |
| 0.9998656374432854 | 0.5005555578162290 | 0.1868217105790057 |
| 0.5003202209582256 | 0.0001024665048494 | 0.1864909169150591 |
| 0.4992247574290326 | 0.4994157374723059 | 0.1850455160380035 |
| 0.2502140986124315 | 0.7500923716980901 | 0.2842756932319792 |
| 0.2496380205381974 | 0.2499345246329036 | 0.2847463798141504 |
| 0.7502351922336830 | 0.7504583434018480 | 0.2874878712146166 |
| 0.7499381003001142 | 0.2504497538989818 | 0.2842133811832939 |
| 0.3871507328527735 | 0.1976138135003810 | 0.6459332719261541 |
| 0.1148114373921735 | 0.3061821266876384 | 0.6487031973452871 |
| 0.4159418498102921 | 0.2211025780109907 | 0.7850316246390923 |
| 0.3529785965899210 | 0.1546814280209043 | 0.8725514793305282 |
| 0.2837874837435855 | 0.0906994346708836 | 0.7896410260463312 |
| 0.3047075577607795 | 0.1162521383163818 | 0.6486503161571603 |
| 0.1960552488364188 | 0.3887428482171542 | 0.6464712110225862 |
| 0.2194198804776618 | 0.4171440142069994 | 0.7857419685140642 |
| 0.1530488799638862 | 0.3537898850815765 | 0.8728759830231813 |
| 0.0891937558533567 | 0.2847933134434256 | 0.7895496510854719 |
| 0.4736538544669674 | 0.2809953985625471 | 0.8194817323889345 |
| 0.0798320043612690 | 0.2677409187456675 | 0.5591394690492111 |
| 0.2324906730132883 | 0.4227646225493708 | 0.5549613781311092 |
| 0.2791851553755095 | 0.4748556013660511 | 0.8205596639388720 |
| 0.4208950414383685 | 0.2340350676528056 | 0.5542460877000681 |
| 0.2660604783990067 | 0.0811101359177030 | 0.5593292715686092 |
| 0.1564554835007677 | 0.3523519853392547 | 0.9838191048171847 |
| 0.3519359193595171 | 0.1580896829732313 | 0.9835030868476140 |
| 0.2242731740628532 | 0.0342966433229047 | 0.8283057429816721 |
| 0.0328671214458152 | 0.2250591740477155 | 0.8278409592103849 |
| 0.2517793636217488 | 0.2531895433223041 | 0.7464235695381944 |

$E_{\perp-V-0^{\circ}}$

1.0000000000000000  
12.4250515482596473 0.0000000000000000 0.0000000000000000  
0.0000000000000000 12.4250515482596473 0.0000000000000000  
0.0000000000000000 0.0000000000000000 9.7373736593534339

O P V C H Fe  
40 8 8 10 10 1

Direct

0.2497334558217261 0.0951994466425461 0.3177897841657895  
0.2498516358158440 0.6031994739418636 0.3199381999359545  
0.7498861161654560 0.1005730951324111 0.3249322251890234  
0.7498763300108138 0.6002145477265088 0.3238634856711613  
0.4002643454029808 0.7504386420216917 0.3197242122582438  
0.4030406826811443 0.2503323155941573 0.3311668502241787  
0.8995903018171418 0.7504033830733761 0.3243694256531029  
0.8979211275829329 0.2504136364592142 0.3218332679190752  
0.2499200805865840 0.7503766058594223 0.1099604518690214  
0.2495857856227204 0.2504823042076794 0.1047109167037803  
0.7498358917270664 0.7504021220430914 0.1167767944392182  
0.7497404560373937 0.2505185455723051 0.1138276356055243  
0.0026868012873607 0.9999574969090617 0.3407198487087015  
0.0028267760088099 0.5007025541838743 0.3407823174615174  
0.4970964061054843 0.0000493045024754 0.3407821523296732  
0.4972112449525383 0.5007322967105878 0.3409882750251185  
0.0995066819653090 0.7504490990094652 0.3196011255457378  
0.0965572869462363 0.2503932090609950 0.3312536661004799  
0.6002080374520844 0.7504586176154717 0.3245522530195402  
0.6017386376348952 0.2503336456423710 0.3220390750620155  
0.2498860825926315 0.8975698515114772 0.3198744593577771  
0.2498072110445051 0.4055479597611864 0.3179871609315867  
0.7499241024393370 0.9006450328056346 0.3237420477460162  
0.7498201137739500 0.4002518646645186 0.3251317802071370  
0.9965599932093951 0.8504021207807781 0.1316710316831617  
0.0021295606512552 0.3502756394949600 0.1346974954190117  
0.5032137902577531 0.8504263493767539 0.1318335016011716  
0.4976806908731817 0.3503155173189896 0.1348850890480122  
0.1494117825024475 0.9952615808715777 0.1280875730058781  
0.1494885286756755 0.5053576315633848 0.1281603088319798  
0.6497329475709606 0.0018092419144509 0.1341112685164418  
0.6497799991812343 0.4989965544591186 0.1342330646567902  
0.3503549665964485 0.9953348212020785 0.1282187005154043  
0.3504247986359772 0.5054095854611376 0.1284220090587667  
0.8500257145815624 0.0018196423365566 0.1340779966142733  
0.8500584540775336 0.4989558074780547 0.1343077247389388

|                    |                    |                    |
|--------------------|--------------------|--------------------|
| 0.0021316218956855 | 0.1504502877070024 | 0.1347500816370513 |
| 0.9966446433054656 | 0.6502940326230799 | 0.1317848249922875 |
| 0.4976364862335245 | 0.1504905456954191 | 0.1347637457463691 |
| 0.5032081895025726 | 0.6503267644167607 | 0.1319634231362841 |
| 0.9985336616362588 | 0.7503807559302516 | 0.2267674540121050 |
| 0.0016509213402642 | 0.2503700059191090 | 0.2325949909486127 |
| 0.5012690372900366 | 0.7504153378431582 | 0.2269445100274439 |
| 0.4980619763230294 | 0.2503666117031003 | 0.2326951723163333 |
| 0.2498410376876663 | 0.9977350324047691 | 0.2240166101512742 |
| 0.2498826997730461 | 0.5029836570361326 | 0.2241498970387497 |
| 0.7498892753722117 | 0.0010683581604098 | 0.2291694524073264 |
| 0.7499065717208850 | 0.4997562829067022 | 0.2293533281319711 |
| 0.0004537341343962 | 0.0003887667699232 | 0.1774332039743669 |
| 0.0005192307978206 | 0.5003134339948829 | 0.1775022885000794 |
| 0.4993131924297671 | 0.0004116364047206 | 0.1775021770989227 |
| 0.4993860232554539 | 0.5003508502305323 | 0.1777020575126542 |
| 0.2498939034483527 | 0.7503864645522853 | 0.2732396157551662 |
| 0.2497585550290111 | 0.2503923111708488 | 0.2708587611086344 |
| 0.7498934763050045 | 0.7504244308325525 | 0.2799413260454031 |
| 0.7498241282675835 | 0.2504289006759279 | 0.2771219744946123 |
| 0.3073941125663140 | 0.3780148790193394 | 0.8514961275409476 |
| 0.1929251220515980 | 0.1232904467269265 | 0.8498865993373386 |
| 0.3440525803589054 | 0.3906370295319590 | 0.7129333966915326 |
| 0.2521375062000715 | 0.3992864227235700 | 0.6265523548107836 |
| 0.1582306383229621 | 0.3903864222655713 | 0.7093739973765949 |
| 0.1916623838661664 | 0.3778428562101155 | 0.8493102286667522 |
| 0.3086668885395056 | 0.1237414457274255 | 0.8507818537301688 |
| 0.3444188857001222 | 0.1114010449131300 | 0.7117575435530767 |
| 0.2519125384361800 | 0.1022985919678163 | 0.6264397820002898 |
| 0.1585802581045641 | 0.1106387752374829 | 0.7103623837507769 |
| 0.4271640144314830 | 0.3910051972810891 | 0.6782895064506818 |
| 0.1420997125752379 | 0.1339088243727034 | 0.9393193833505080 |
| 0.3585764642622848 | 0.1347159252098535 | 0.9409689285966891 |
| 0.4272725450124284 | 0.1114139191015298 | 0.6761215361971082 |
| 0.3567380984721993 | 0.3672366112922418 | 0.9422084136257922 |
| 0.1402863911448904 | 0.3669189036106459 | 0.9381810545609923 |
| 0.2523749272901199 | 0.0944107620899075 | 0.5154510684984146 |
| 0.2533529248125319 | 0.4071651450586273 | 0.5155719338757407 |
| 0.0759828120812998 | 0.3905316343570888 | 0.6715069833691345 |
| 0.0760566128879674 | 0.1101264016797856 | 0.6734905023890008 |
| 0.2510123978467718 | 0.2507531767363744 | 0.7409717847727819 |

E<sub>1</sub>-V-45°

1.0000000000000000  
12.4250515482596473 0.0000000000000000 0.0000000000000000  
0.0000000000000000 12.4250515482596473 0.0000000000000000  
0.0000000000000000 0.0000000000000000 9.7373736593534339

O P V C H Fe  
40 8 8 10 10 1

Direct

0.2500431528502414 0.0960887065468213 0.3311639827618652  
0.2513319743121342 0.6031252585684032 0.3255257224694234  
0.7493288467453597 0.1002759535619442 0.3240101522198864  
0.7499564801035992 0.6007550520773487 0.3246784029710215  
0.4004428849778799 0.7513148276125388 0.3238965186191536  
0.4045527680394571 0.2507435314669632 0.3303706276579225  
0.8999808049703601 0.7507536307540003 0.3246439821538999  
0.8975546882546737 0.2495283110057417 0.3261861992049264  
0.2500317870201773 0.7506186052509121 0.1149664331249889  
0.2496835421069891 0.2498611563820357 0.1088730984761279  
0.7501430446644133 0.7506851519796228 0.1171326883250081  
0.7505524251594221 0.2506580775779819 0.1151100840372178  
0.0011873450236658 0.0015520645671562 0.3429267710050550  
0.9996900094316894 0.5013666295461028 0.3433777311034182  
0.5008083571238481 0.0000467014143787 0.3433399972398075  
0.4988623801695629 0.4993281326251947 0.3424950747396954  
0.0998142889276617 0.7495886666142119 0.3240356121062115  
0.0958079045623273 0.2502735810415188 0.3311038397329575  
0.6002665362912643 0.7503659474699751 0.3246007505640282  
0.6028423269932036 0.2517442859778825 0.3254933790487144  
0.2490616568979404 0.8978367650449116 0.3258172428767656  
0.2503887723273631 0.4048454696984657 0.3301605879686767  
0.7502774947235406 0.9004288918640273 0.3248308580552878  
0.7510094735879517 0.4009275447395981 0.3241030334244660  
0.0002797688208523 0.8511845494750984 0.1346840715221692  
0.9985768140341632 0.3508222172827031 0.1377229148244436  
0.5011555512689575 0.8503816778190542 0.1335787531711398  
0.5004583074340784 0.3497075421821499 0.1347659843698098  
0.1509786948350940 0.0003706095964312 0.1353694782559933  
0.1498377124283465 0.5023214550045928 0.1371128347006705  
0.6503680060723450 0.9994498788548684 0.1336554968374379  
0.6495646895698536 0.5005094184662436 0.1346617613095192  
0.3504165720364187 0.9989959227007218 0.1375237998286064  
0.3493105763028436 0.5008973087411370 0.1346584798426569  
0.8507623417582958 0.0004970740958529 0.1347317811668497  
0.8499755601110398 0.5016089695381784 0.1336803623100609

|                    |                    |                    |
|--------------------|--------------------|--------------------|
| 0.9996966739305673 | 0.1513982533159024 | 0.1354427674061084 |
| 0.9990466395654930 | 0.6507799146641540 | 0.1335374862900941 |
| 0.5019169383555293 | 0.1502455824170595 | 0.1371794298268599 |
| 0.5001283272992328 | 0.6499535430150325 | 0.1344953783658271 |
| 0.9999108663321161 | 0.7506114958912448 | 0.2290388328633443 |
| 0.9999439163607080 | 0.2504994304089903 | 0.2342569321402010 |
| 0.5003585474336398 | 0.7504689627531312 | 0.2289595412282494 |
| 0.5004666896924069 | 0.2506251556641691 | 0.2336083978809631 |
| 0.2501215010390839 | 0.0003418046428704 | 0.2341159516133717 |
| 0.2502379386007358 | 0.5008208016764851 | 0.2335056933671273 |
| 0.7502151356317768 | 0.0003120643006692 | 0.2291316625390493 |
| 0.7500892034859875 | 0.5008136243635103 | 0.2291071325979947 |
| 0.0010071983962213 | 0.0014180871369488 | 0.1796956598468167 |
| 0.0000863380908224 | 0.5006643513920215 | 0.1800261782541092 |
| 0.5002407928172382 | 0.0004798991028314 | 0.1799891160519176 |
| 0.4992626311601397 | 0.4996621773669562 | 0.1792704138273959 |
| 0.2501118711592054 | 0.7505185427655976 | 0.2782589535442871 |
| 0.2500913040108757 | 0.2503613709264041 | 0.2751563398370673 |
| 0.7501248094504352 | 0.7506054888712631 | 0.2802906500134417 |
| 0.7502702202122721 | 0.2506076188672281 | 0.2784003261446858 |
| 0.1993702174249279 | 0.3810119036177541 | 0.8439710883365861 |
| 0.2995048753993346 | 0.1177699435775535 | 0.8417584880024747 |
| 0.2174984838018053 | 0.4151010964840696 | 0.7052168952154058 |
| 0.1468230471592986 | 0.3561868193497976 | 0.6183174983377572 |
| 0.0859984818417151 | 0.2840126661931820 | 0.7009354111801311 |
| 0.1173749696774188 | 0.2992361966517044 | 0.8413222787902913 |
| 0.3812218582556438 | 0.1998372425547290 | 0.8436149176448756 |
| 0.4149083413041952 | 0.2175412886342279 | 0.7045934417512484 |
| 0.3557879013839231 | 0.1465326388750276 | 0.6183479135294493 |
| 0.2839235741537575 | 0.0859139645059439 | 0.7016317750259836 |
| 0.2763274402715800 | 0.4738521647630410 | 0.6707058762874012 |
| 0.2567983564352218 | 0.0873902609017007 | 0.9308051552698892 |
| 0.4102061311892812 | 0.2414288272743522 | 0.9342231639168421 |
| 0.4735813721708892 | 0.2762304608120489 | 0.6694862388614556 |
| 0.2406669591524417 | 0.4097686061607811 | 0.9349097635420355 |
| 0.0866962878461893 | 0.2562969665045614 | 0.9300317977443342 |
| 0.3616845258884553 | 0.1422649757121129 | 0.5075134362929463 |
| 0.1429222370757418 | 0.3624517029967948 | 0.5074948624852503 |
| 0.0278643263945579 | 0.2260874650817270 | 0.6624520709620549 |
| 0.2259380835711612 | 0.0275881714484731 | 0.6637714731157139 |
| 0.2502444916409665 | 0.2503173602131897 | 0.7347243110431311 |



S<sub>I</sub>-V-45°

|                     |                     |                    |
|---------------------|---------------------|--------------------|
| 1.0000000000000000  |                     |                    |
| 12.4250515482596473 | 0.0000000000000000  | 0.0000000000000000 |
| 0.0000000000000000  | 12.4250515482596473 | 0.0000000000000000 |
| 0.0000000000000000  | 0.0000000000000000  | 9.7373736593534339 |

|    |   |   |    |    |    |
|----|---|---|----|----|----|
| O  | P | V | C  | H  | Fe |
| 40 | 8 | 8 | 10 | 10 | 1  |

Direct

|                    |                    |                    |
|--------------------|--------------------|--------------------|
| 0.2510054907228699 | 0.0950754736751744 | 0.3386915492085092 |
| 0.2503310086028415 | 0.6017888004606564 | 0.3264228619758707 |
| 0.7495999429103937 | 0.0995106062770188 | 0.3248951868976114 |
| 0.7506914395939148 | 0.6001936719267933 | 0.3263981518820995 |
| 0.4000039867616846 | 0.7498936057464343 | 0.3271380619190559 |
| 0.4049643663728081 | 0.2520946164894439 | 0.3355364926090548 |
| 0.8996788206743914 | 0.7507449716457810 | 0.3263884563948087 |
| 0.8972614630658288 | 0.2493454751463639 | 0.3250778974689453 |
| 0.2498394866366143 | 0.7509444785898166 | 0.1180331225134035 |
| 0.2529351505613640 | 0.2463112587492170 | 0.1145742177049119 |
| 0.7496072935730708 | 0.7501696069277436 | 0.1190375179531586 |
| 0.7479225938233030 | 0.2500848363298950 | 0.1167793869836912 |
| 0.9987392870159497 | 0.0017161477194926 | 0.3446558862546212 |
| 0.9995769001783807 | 0.4990281943949571 | 0.3438733780901647 |
| 0.5016234751873248 | 0.9982357634574135 | 0.3476361254893059 |
| 0.4989822951699511 | 0.4998642202786724 | 0.3452675183068223 |
| 0.0994664731018055 | 0.7487506748256711 | 0.3270383032014975 |
| 0.0948997544791764 | 0.2471444254762746 | 0.3282377494898013 |
| 0.5998999143665135 | 0.7488638348472737 | 0.3266568868177317 |
| 0.6032063066782732 | 0.2510944258064655 | 0.3310431593510185 |
| 0.2487795272080812 | 0.8967782238627665 | 0.3302812456744781 |
| 0.2482668041183221 | 0.4038232816725949 | 0.3326410504646390 |
| 0.7492198696545110 | 0.8996536738010130 | 0.3268657065946411 |
| 0.7506914843735134 | 0.4004362320400919 | 0.3253681686154902 |
| 0.0011398733936652 | 0.8503538460968527 | 0.1366883459893202 |
| 0.9983832208332419 | 0.3496453203367362 | 0.1359957114176260 |
| 0.5000735561213808 | 0.8498032397254182 | 0.1369064687194394 |
| 0.5017157715431313 | 0.3491286373142492 | 0.1393326763266396 |
| 0.1508406316286506 | 0.0011483188469853 | 0.1414522636530277 |
| 0.1496770757656984 | 0.5005371448804055 | 0.1372423281868633 |
| 0.6494342244881205 | 0.9986679880543096 | 0.1355909100654233 |
| 0.6493288672392508 | 0.5009595742333851 | 0.1364448410151511 |
| 0.3500667711653573 | 0.9992046217763662 | 0.1428962806479162 |
| 0.3493426175212074 | 0.4988871118540189 | 0.1373162147977963 |
| 0.8499118533828481 | 0.9981279766667601 | 0.1356802325826160 |
| 0.8497994240850213 | 0.5007543345513646 | 0.1347232529990771 |

|                    |                    |                    |
|--------------------|--------------------|--------------------|
| 0.9972371690508500 | 0.1497022129532365 | 0.1334893947600921 |
| 0.9991944889452886 | 0.6499436696010463 | 0.1360742380498155 |
| 0.5018087699998103 | 0.1498598148299967 | 0.1432597472316696 |
| 0.4989355169687103 | 0.6493657883156559 | 0.1363762190871757 |
| 0.9999218896146640 | 0.7499226895172835 | 0.2314768310862110 |
| 0.9988753586991174 | 0.2489404991328405 | 0.2316925838764634 |
| 0.4996493990578413 | 0.7494838665855411 | 0.2315904244824566 |
| 0.5009584084332805 | 0.2506143446123515 | 0.2389019701875069 |
| 0.2500474543016492 | 0.0001615164460802 | 0.2401263066259981 |
| 0.2494497066649352 | 0.4991464494042726 | 0.2347893696812187 |
| 0.7496656230054002 | 0.9992565339212158 | 0.2305073897456465 |
| 0.7500352078340036 | 0.5003802070261822 | 0.2305780628297903 |
| 0.0002187006523079 | 0.0005042186753527 | 0.1814409460363471 |
| 0.9998851281362571 | 0.4996343745660852 | 0.1805745491134007 |
| 0.4998308000238593 | 0.9996590817278974 | 0.1843687284863524 |
| 0.4991220915876690 | 0.4992006858907245 | 0.1820272809618959 |
| 0.2497928116667296 | 0.7496621286744716 | 0.2813180582632884 |
| 0.2505020738342542 | 0.2489633587924668 | 0.2807224691963331 |
| 0.7497169589316472 | 0.7500028786776641 | 0.2821913389620396 |
| 0.7497821718451505 | 0.2499533490335652 | 0.2800659758685262 |
| 0.3586551514665154 | 0.1580619262402246 | 0.6253949128925278 |
| 0.4158430847262366 | 0.2139403174754061 | 0.7311679323951505 |
| 0.3728913970884563 | 0.1815120287970166 | 0.8602310281738278 |
| 0.2885979572283221 | 0.1061418907403103 | 0.8356596686861921 |
| 0.2792711576922381 | 0.0914476440307845 | 0.6904284382521063 |
| 0.1284516859347107 | 0.3337923745279709 | 0.6231045594949673 |
| 0.2131961826591925 | 0.4066126715680725 | 0.6550066644364843 |
| 0.2256493051114120 | 0.4091817119367847 | 0.8010141918506584 |
| 0.1477529268541632 | 0.3372552908801874 | 0.8593966542579684 |
| 0.0884684831998884 | 0.2900292454886804 | 0.7485705166197330 |
| 0.4791421825919868 | 0.2729466275476402 | 0.7154120962048401 |
| 0.1014861814494446 | 0.3120173791714353 | 0.5207521781594607 |
| 0.2614706853092303 | 0.4490608299866001 | 0.5794627845662431 |
| 0.3747726740313768 | 0.1639067304260190 | 0.5163417133343550 |
| 0.2224153049093345 | 0.0397815897778510 | 0.6372105473210340 |
| 0.2839538834149022 | 0.4560069861431475 | 0.8587990121124617 |
| 0.3952972916041553 | 0.2130878306110109 | 0.9598329620236138 |
| 0.2382522594833159 | 0.0702445937130507 | 0.9144973444340004 |
| 0.1379673854905799 | 0.3199136563615144 | 0.9676211353938390 |
| 0.0249727452425179 | 0.2304651472450621 | 0.7583682679941718 |
| 0.2516685992601186 | 0.2523792864634363 | 0.7368217056019838 |

$E_{\parallel}-V-0^{\circ}$

1.0000000000000000  
12.4250515482596473 0.0000000000000000 0.0000000000000000  
0.0000000000000000 12.4250515482596473 0.0000000000000000  
0.0000000000000000 0.0000000000000000 10.8465968913686392

O P V C H Fe  
40 8 8 10 10 1

Direct

0.2500159396114394 0.0931720948899074 0.3078215198604334  
0.2501062608823080 0.6026580511450382 0.2981624040119797  
0.7499178478031514 0.0995255406020231 0.2979408276430222  
0.7500481252235925 0.5999844922368178 0.2984262920867527  
0.4004160557098422 0.7493637140636953 0.2981174806912780  
0.4060171138664892 0.2496294206315421 0.3058022027590147  
0.8999109777429077 0.7497932797706550 0.2986858408210751  
0.8965877038942894 0.2500803197202541 0.2986568573574426  
0.2501290954026453 0.7497719266406248 0.1091558166442194  
0.2492529891513397 0.2470464596542588 0.1148783250380312  
0.7500364627060518 0.7501179314163058 0.1122959498731529  
0.7501931594901013 0.2498329854190466 0.1091291299605205  
0.0003917672743760 0.0002225033376218 0.3161305204164908  
0.0009177602125909 0.4993814839196693 0.3153543075009296  
0.4997154328192936 0.0006140211612263 0.3159858163656189  
0.4992501843732821 0.4990248776664071 0.3152251775925301  
0.0996907161757618 0.7493642199210203 0.2979157693740899  
0.0938207078551955 0.2495951385656989 0.3069003812019433  
0.6001960869506420 0.7497627648116363 0.2987597252895484  
0.6032763397468421 0.2501052000283810 0.2982305005269162  
0.2501027010964487 0.8959955821665873 0.2987756005106029  
0.2499649970915914 0.4053473536809570 0.3048561977580897  
0.7500141650666339 0.8997051226657142 0.2989606119027123  
0.7499383567939726 0.4002531144036137 0.2980329179478035  
0.9995629073637829 0.8501189597798484 0.1276999087685904  
0.9995746080698231 0.3494686700676679 0.1294325996160348  
0.5004669386558520 0.8501278148450738 0.1278567444288483  
0.5006750808731346 0.3495081536002708 0.1287266197291552  
0.1502580331071340 0.9991582556503279 0.1301011055140773  
0.1502714856686266 0.5007095701043937 0.1283494954327289  
0.6497306741018879 0.9989372729673918 0.1276983260255221  
0.6497708400544773 0.5003249732117367 0.1273527916770605  
0.3498254276895580 0.9992560765165078 0.1300714798141587  
0.3498176023560313 0.5005884945342119 0.1283499207845207  
0.8503643148430656 0.9990317102057100 0.1277974689355175  
0.8503472542174457 0.5002075554238163 0.1274546257534093  
0.9992014313701522 0.1499471930881844 0.1296895746455360

0.9992019537993572 0.6495208158119884 0.1273494423812006  
0.5010215242345845 0.1499363973147601 0.1289935087468563  
0.5007934528743190 0.6495324522995225 0.1274789169341655  
0.9998436041943332 0.7497346362078332 0.2126715125665817  
0.0000185657458947 0.2497455171788102 0.2174179029110320  
0.5002219825223598 0.7497384291598173 0.2128459269379678  
0.5000549922526504 0.2497640733487229 0.2166865326416261  
0.2500373246335652 0.9996528065767911 0.2179042527924029  
0.2500279711714613 0.4996952167534456 0.2162067924711420  
0.7500234949829830 0.9995802327014189 0.2128328995920373  
0.7500388112739039 0.4999567316784196 0.2126373307992955  
0.0007003151211225 0.0004574452093251 0.1694483561969353  
0.0007122401389179 0.4991685341450381 0.1686762849735661  
0.4994016904953308 0.0004939023035004 0.1692986948631741  
0.4994144991501636 0.4991650190089090 0.1685399953704473  
0.2500487501872728 0.7495498353844283 0.2558816246202147  
0.2498015493393877 0.2489168589540361 0.2633568214204127  
0.7500637168945707 0.7499278530176161 0.2588485540453748  
0.7500200996037284 0.2498232753582166 0.2558545369780607  
0.3090505872519832 0.1695540561236376 0.8725381789633908  
0.3458678126684107 0.2783523825044482 0.8792191569909418  
0.2543658944034032 0.3469477499356328 0.8822017045211297  
0.1602723247203965 0.2816921242921507 0.8770253687984473  
0.1935186722111129 0.1713755630384799 0.8713495553592071  
0.3095843171017522 0.1715902964383039 0.5669140120678452  
0.3447765117879130 0.2812112769655652 0.5614192987440343  
0.2520908822158753 0.3485309888414920 0.5596202483288415  
0.1588833633266945 0.2817315909250177 0.5642945003559163  
0.1938105273964075 0.1716999391144351 0.5685658098005441  
0.4293497047703478 0.3041006183743398 0.8806445506028495  
0.3611393280623045 0.1010790691013145 0.5669134257497851  
0.4277334746404373 0.3084617311741412 0.5601808707316026  
0.3593737553383664 0.0982151085577044 0.8707355220769716  
0.1409906898375186 0.1016551410192572 0.8694820286324108  
0.2524002823700230 0.4358345180663181 0.5582614939074743  
0.2560115686873010 0.4342890719060454 0.8853611065643223  
0.0777791804996448 0.3104116219949289 0.8779630847061344  
0.0760755915317907 0.3094253532895845 0.5644827759770547  
0.1421302213499981 0.1012886083585731 0.5693504408599107  
0.2521072465459253 0.2497074904552056 0.7200130106941559

$E_{\parallel}$ -V-45°

1.00000000000000

12.4250515482596473 0.0000000000000000 0.0000000000000000  
0.0000000000000000 12.4250515482596473 0.0000000000000000  
0.0000000000000000 0.0000000000000000 10.8465968913686392

O P V C H Fe  
40 8 8 10 10 1

Direct

0.2501737398705330 0.0936292742309490 0.3080999931042783  
0.2502012716819522 0.6030311951858920 0.2986537345635440  
0.7499392375679363 0.0991808894082666 0.2968758470134176  
0.7499002708637192 0.5999690070729358 0.2970877974223001  
0.4005890201936140 0.7495766717158787 0.2969362746542430  
0.4059930121186284 0.2495243426725153 0.3078516722777564  
0.8997539090971074 0.7496922812958573 0.2972881483219396  
0.8964669084056496 0.2495595158552604 0.2991338781262129  
0.2501069179309923 0.7501537186932481 0.1089578805770586  
0.2499486458803375 0.2495098376581808 0.1161621480330481  
0.7501555318574944 0.7498343790551232 0.1105170082967675  
0.7498610890983031 0.2497460185587599 0.1088549878855076  
0.9991805758108541 0.9994825842171764 0.3160367978358565  
0.9997536019414355 0.5001584445815297 0.3158404825871344  
0.5006218003030227 0.9993248523097691 0.3157098369332374  
0.5000305100562485 0.5003372644147674 0.3154426149144172  
0.0995921661683994 0.7495671584998860 0.2970487464448297  
0.0939075452781921 0.2494426061702200 0.3075821904814333  
0.6002895722074300 0.7496346912218641 0.2969338418482153  
0.6033802126104533 0.2495443121846392 0.2993199248929059  
0.2501867213384870 0.8961389826536319 0.2999732510387645  
0.2501372038970118 0.4056798389401806 0.3074245925579007  
0.7498650976457242 0.8994242531380721 0.2971899441800971  
0.7499227357344154 0.4001610986947171 0.2969552414723395  
0.9996964500644623 0.8500847232068409 0.1266700251141586  
0.9995031935424592 0.3494097817099373 0.1305462782683477  
0.5002894519721082 0.8500826359450926 0.1263186136962133  
0.5002192071208782 0.3492989999961864 0.1306048451987110  
0.1502375480558342 0.9992246704402916 0.1312706147405365  
0.1501650530056224 0.4999087167496086 0.1302396718103722  
0.6495617988048750 0.9993173899250820 0.1263200839343313  
0.6495480813940233 0.4999497414536549 0.1263900907113893  
0.3496103731565867 0.9991269065451291 0.1308712783529842  
0.3496579659616117 0.4999539908584723 0.1298243698523081  
0.8503331197367388 0.9991536006422947 0.1264093625625264  
0.8503813502932758 0.5000702555474845 0.1264956525008358  
0.9994140892307257 0.1498375465436155 0.1303467730733701  
0.9996305772955125 0.6492938146125624 0.1265232933210640

0.5002228797802246 0.1499603477663598 0.1304564810015734  
0.5003132495395661 0.6492981450827600 0.1261359223958038  
0.9998746905796239 0.7496484472106957 0.2115873330905416  
0.0000829189763607 0.2495901017699609 0.2182026338218535  
0.5001675658615525 0.7496404587803056 0.2112756312991380  
0.4998094038737619 0.2496157989457330 0.2184262118973166  
0.2500247900661563 0.9996539915675697 0.2189603396959114  
0.2500195313865774 0.4993740451181097 0.2178280894360185  
0.7499372404577827 0.9994860159926233 0.2113975952380258  
0.7499464050791218 0.4998423911923879 0.2114288906417769  
0.0004999533887258 0.0002427737067237 0.1694301297636400  
0.0005953498364448 0.4990749565206443 0.1692284914162201  
0.4994163148755462 0.0002389035620212 0.1691170287707706  
0.4993236414774813 0.4990805883289795 0.1688521408890935  
0.2500909807090892 0.7495980483912632 0.2556421825546735  
0.2499234206300116 0.2496523032000866 0.2645923564096364  
0.7500320189843990 0.7497199840360977 0.2570262171049222  
0.7499839352596638 0.2497033743166028 0.2555420790712049  
0.3435208373226999 0.2349650386039102 0.8798273190568082  
0.2884964004563813 0.3356569307323412 0.8754178289366834  
0.1751006420667593 0.3140736886046014 0.8725573156324984  
0.1612927566956301 0.1994374388846580 0.8747987819139098  
0.2654447000318427 0.1513692436075900 0.8794976083013921  
0.3448333148603382 0.2381047171514936 0.5617871005381261  
0.2882744826865178 0.3380874348944047 0.5667402548637170  
0.1750189718291111 0.3149076246056524 0.5686635087875445  
0.1627977526750612 0.1999107989066147 0.5652399473481680  
0.2678432886359232 0.1532760908984443 0.5608743061776877  
0.3257216582294475 0.4146536800621092 0.8752230308808890  
0.4316150968985539 0.2284180862682419 0.5619545719744536  
0.3245729634985821 0.4174988623232210 0.5673766059821048  
0.4302316090027531 0.2239960937778633 0.8802838721080235  
0.2822463114595664 0.0655980181901157 0.8797245194882635  
0.1104691539807376 0.3736835001119942 0.5679925867042215  
0.1112789734184361 0.3735906294715861 0.8717505993230006  
0.0850001928398783 0.1569342447505946 0.8739261196709549  
0.0872180466377515 0.1561762158874345 0.5640760064465269  
0.2859589585941151 0.0678630469378092 0.5599725861269036  
0.2458391068715713 0.2488343880633366 0.7202237614831191

$S_{\parallel-V-0^\circ}$

1.0000000000000000

12.4250515482596473 0.0000000000000000 0.0000000000000000



0.0000000000000000 12.4250515482596473 0.0000000000000000  
0.0000000000000000 0.0000000000000000 10.8465968913686392

O P V C H Fe  
40 8 8 10 10 1

Direct

|                    |                    |                    |
|--------------------|--------------------|--------------------|
| 0.2517348569256568 | 0.0960943643243603 | 0.3069300710153664 |
| 0.2513156448274341 | 0.6037864855216891 | 0.3005349601851109 |
| 0.7512921374563643 | 0.0997454546642268 | 0.2917193884905628 |
| 0.7514179883966590 | 0.6005782692470524 | 0.2924042638593446 |
| 0.4021615366993960 | 0.7506318325823864 | 0.2971042423269954 |
| 0.4062093901108753 | 0.2504947464423814 | 0.3066330482331393 |
| 0.9007170975104392 | 0.7506141690609028 | 0.2898545124366378 |
| 0.8981031836179988 | 0.2504020654750324 | 0.2939390059171801 |
| 0.2536304613719655 | 0.7501478441676199 | 0.1087591337643865 |
| 0.2545301123988713 | 0.2505943741186842 | 0.1054289440399934 |
| 0.7488590403686283 | 0.7501969998288429 | 0.1055805140277059 |
| 0.7507573912655456 | 0.2505548674545837 | 0.1041628345638211 |
| 0.9977118686110958 | 0.9990433076922609 | 0.3099324177908789 |
| 0.9975760997070128 | 0.5019057046438760 | 0.3101704879521069 |
| 0.5040641354622052 | 0.9975193002363447 | 0.3164170769815108 |
| 0.5042710286588864 | 0.5037804984833363 | 0.3172729150423066 |
| 0.1000826083702998 | 0.7504607239650433 | 0.2909024339688228 |
| 0.0963890191104309 | 0.2501931707564506 | 0.3006886802658651 |
| 0.6020441370790385 | 0.7504767179186087 | 0.2958109501630600 |
| 0.6062302831020204 | 0.2502218976496526 | 0.2991939301160561 |
| 0.2512747480985518 | 0.8971786714138917 | 0.2999112827653114 |
| 0.2513518899280914 | 0.4047234981762560 | 0.3073469126259382 |
| 0.7511432721109775 | 0.9002865877057784 | 0.2920559474078102 |
| 0.7511611989744761 | 0.4010306000089416 | 0.2918635570918819 |
| 0.0010325093609626 | 0.8509259495303642 | 0.1195040407978569 |
| 0.0001224548878895 | 0.3505195734401687 | 0.1254628379395220 |
| 0.5015011612689970 | 0.8507141782235305 | 0.1255267024987794 |
| 0.5030877191224136 | 0.3511333395635139 | 0.1344116815991658 |
| 0.1521559156963498 | 0.0000018625880639 | 0.1307294003035872 |
| 0.1521912293752161 | 0.5011675135512728 | 0.1311932135732872 |
| 0.6500300697542025 | 0.9999585522276245 | 0.1217550161297986 |
| 0.6500145474704438 | 0.5012562014157240 | 0.1221444830513342 |
| 0.3517200960331303 | 0.0000037630848550 | 0.1320677187303886 |
| 0.3517676157898931 | 0.5009029853795602 | 0.1328727258930874 |
| 0.8507396015871338 | 0.9998064138859064 | 0.1198814835161949 |
| 0.8507188543017677 | 0.5009293141191595 | 0.1200829510074740 |
| 0.9999162865226394 | 0.1504247567081192 | 0.1252208488696238 |
| 0.0008672546595906 | 0.6499759344821358 | 0.1196258242876629 |
| 0.5028701993473391 | 0.1502602182083184 | 0.1337425413836795 |

0.5013775522616979 0.6503044144369526 0.1257610614653218  
0.0010857351191699 0.7504866893511903 0.2042848811921493  
0.0019133228924430 0.2503855247268310 0.2124238457912989  
0.5013248087183211 0.7505875622872628 0.2110792458066017  
0.5017679795044336 0.2504782729085328 0.2200841334414160  
0.2511358257639033 0.0009066779966870 0.2192929474458305  
0.2510605137295043 0.5000514703152302 0.2199230855428675  
0.7512469035062874 0.0000193635958370 0.2057454273954227  
0.7512844534018841 0.5008614031992652 0.2060336949181024  
0.0018026798020492 0.0010309467868856 0.1635223324272271  
0.0018091568042936 0.4998808877283349 0.1637733016880339  
0.5004995652865144 0.0003574051755542 0.1697287761096832  
0.5005113374114764 0.5009368804140625 0.1706328565668669  
0.2511529419677259 0.7504117673257716 0.2553452423043549  
0.2515615149278728 0.2504646695897775 0.2547027651963275  
0.7512358865655868 0.7503858019631866 0.2520769468348089  
0.7524520855337531 0.2504308130052716 0.2509991401622161  
0.5376885361053128 0.1518139758248936 0.8653262643151087  
0.6091857512246071 0.2416671511032742 0.8652032281174491  
0.5464497731253153 0.3370165665127323 0.8735036453627577  
0.4356353292836309 0.3070918130514845 0.8802143727677971  
0.4297325798157557 0.1920262180213209 0.8756737427817582  
0.4490823844507618 0.1595230399854907 0.5593131808077889  
0.5599789859568951 0.1883688279945497 0.5526422182880504  
0.5670139826765653 0.3036757869894255 0.5573774976475903  
0.4597143989177737 0.3450181003075936 0.5672961742387125  
0.3876592846183897 0.2556958905258070 0.5692527611011960  
0.6961280234030588 0.2382417372410640 0.8562227090396956  
0.4171827680115922 0.0782062354947471 0.5598997557030334  
0.6268900590583717 0.1325758615045916 0.5445948486800547  
0.5617229498318080 0.0679451652052047 0.8587590992810773  
0.3566572008465950 0.1444378993353054 0.8817930803953259  
0.6401526398869024 0.3513172527824838 0.5520086231842732  
0.5780970852463132 0.4184930597338889 0.8716609776861279  
0.3677143017842315 0.3615793549755356 0.8885261003181385  
0.4370911827892171 0.4292798688276917 0.5726568407142753  
0.3008601676735386 0.2601632757511764 0.5799734568901157  
0.4985320357555434 0.2479981480785800 0.7165979667779219

**E<sub>l</sub>-P<sub>vo</sub>-0°**

1.0000000000000000  
12.4250515482596473 0.0000000000000000 0.0000000000000000  
0.0000000000000000 12.4250515482596473 0.0000000000000000  
0.0000000000000000 0.0000000000000000 9.7373736593534339

O P V C H Fe  
40 8 8 10 10 1

**Direct**

0.2520219580876280 0.0954611544891856 0.3503588361593598  
0.2503292155403660 0.6038788869086563 0.3413562246730847  
0.7493019428710771 0.0996537653178817 0.3350208320265193  
0.7498091387474994 0.6007087184031515 0.3336976006081617  
0.4011876187994347 0.7503491790354081 0.3345658324506266  
0.4054119825382281 0.2506773677661993 0.3632697725379253  
0.8994833985011981 0.7504988529509758 0.3326150397437059  
0.8972450278388049 0.2504599613373528 0.3318589428973387  
0.2504201471700894 0.7503435957067703 0.1280291506866035  
0.2610308209185219 0.2503625757196750 0.1289630774705658  
0.7494925229226744 0.7506322165458448 0.1256464656195814  
0.7435288527410585 0.2504090335363312 0.1273109782809922  
0.9973237475488965 0.0010322318243009 0.3532208754789551  
0.9972761006718129 0.4999486581631354 0.3531133485212652  
0.5022076548787532 0.9891252495217621 0.3606207945430071  
0.5024720669971214 0.5122129894517371 0.3602523790594199  
0.0989975159885756 0.7504546912273200 0.3334116584389575  
0.0957791922871554 0.2504499965251038 0.3390183114764271  
0.6006755330566067 0.7504423595590192 0.3343906879495796  
0.6056152469676460 0.2507112231835971 0.3539861441448080  
0.2504307971458349 0.8969476730596482 0.3412779000930578  
0.2519967926477454 0.4054063632961656 0.3502007344661024  
0.7497341337736670 0.9003112545086132 0.3339605239207998  
0.7494277687968743 0.4014215547666031 0.3348062185259959  
0.9996098805131706 0.8510848448083415 0.1430599035110633  
0.9989882589561371 0.3506375176798802 0.1443312849453459  
0.5009861448388119 0.8504397680612051 0.1435834110350857  
0.5017242702400734 0.3504217025044621 0.1693774626401372  
0.1513347977431202 0.0005944659170759 0.1535894812762124  
0.1513480098730230 0.5003229201015349 0.1534719666280220  
0.6486239560656323 0.0007700157435088 0.1448447218253390  
0.6487224794637297 0.5002689953061752 0.1445403903336164  
0.3510721105868169 0.9998611080944547 0.1545975451928895  
0.3510892342208677 0.5011904062932983 0.1545830937199152  
0.8493823340496399 0.0007138000329074 0.1430032912525767  
0.8494483541543453 0.5003079189577611 0.1427111062856686

|                    |                    |                    |
|--------------------|--------------------|--------------------|
| 0.9989911817275613 | 0.1503118845376448 | 0.1443248109722318 |
| 0.9996078743091412 | 0.6498974991320454 | 0.1430171195101909 |
| 0.5016706165923772 | 0.1506982843971781 | 0.1696551158160746 |
| 0.5010605429782732 | 0.6506961991712573 | 0.1432765249701651 |
| 0.9998580835202253 | 0.7504784231326687 | 0.2373752471598539 |
| 0.0011663259929412 | 0.2504752404921682 | 0.2408985080686973 |
| 0.5004952457701757 | 0.7505024895378878 | 0.2393340272023914 |
| 0.5008845374731985 | 0.2506504207003886 | 0.2660127113063884 |
| 0.2504276284074969 | 0.0007174539761419 | 0.2517571916694863 |
| 0.2504185896821787 | 0.5001978149804036 | 0.2516782735944433 |
| 0.7498825961671574 | 0.0002701038366775 | 0.2383506697404770 |
| 0.7499668496038550 | 0.5007543592648598 | 0.2380995373067822 |
| 0.0008144970946758 | 0.0013210789085866 | 0.1900917120368920 |
| 0.0008309493300881 | 0.4996446356894554 | 0.1899845868771580 |
| 0.4993577805188803 | 0.9981466808048127 | 0.1976865967375517 |
| 0.4994619052251641 | 0.5030308915175165 | 0.1973510947094185 |
| 0.2497912198311452 | 0.7504105760310391 | 0.2912976543565739 |
| 0.2520303730555642 | 0.2504265135302658 | 0.2947734827998583 |
| 0.7502761100670831 | 0.7505408911275716 | 0.2888472545499097 |
| 0.7507818859963595 | 0.2505037660218339 | 0.2906167688362645 |
| 0.5577164350182399 | 0.1093502440679870 | 0.6270831862147899 |
| 0.4427078699637065 | 0.3979937003236631 | 0.6283117786197805 |
| 0.5954758849729515 | 0.1211361956065144 | 0.7651448592703394 |
| 0.5029816417102030 | 0.1257082331334917 | 0.8534770050360483 |
| 0.4088603336046701 | 0.1170306533087491 | 0.7688327570295621 |
| 0.4433160338590879 | 0.1062717478887032 | 0.6297373303349212 |
| 0.5571529065957567 | 0.3961145364137024 | 0.6272623161069155 |
| 0.5938453908236979 | 0.3851125844660294 | 0.7658873114333261 |
| 0.5006484997156910 | 0.3797780210060018 | 0.8529409024628107 |
| 0.4071685688980353 | 0.3872601449555736 | 0.7669758027463697 |
| 0.6788507752474425 | 0.1266052299625349 | 0.7979154464611128 |
| 0.3916583296284780 | 0.4008945099452568 | 0.5379025917463472 |
| 0.6073710762750081 | 0.3988645045470948 | 0.5362032404106274 |
| 0.6769849405487446 | 0.3806036613872500 | 0.7998538406590184 |
| 0.6071359892296766 | 0.1068014889964726 | 0.5353294357818933 |
| 0.3916170003228734 | 0.1025801002511153 | 0.5399728323042670 |
| 0.5007161809115995 | 0.3659695520901036 | 0.9627882201546671 |
| 0.5038774271155162 | 0.1394635267817591 | 0.9633353628858963 |
| 0.3262392764257620 | 0.1202879024179307 | 0.8050377208308448 |
| 0.3242799227186502 | 0.3833729908181054 | 0.8020550362674734 |
| 0.5006749259280551 | 0.2525700195364852 | 0.7222923696034785 |

**E<sub>1</sub>-P<sub>V</sub>-0°**

1.0000000000000000  
12.4250515482596473 0.0000000000000000 0.0000000000000000  
0.0000000000000000 12.4250515482596473 0.0000000000000000  
0.0000000000000000 0.0000000000000000 9.7373736593534339

O P V C H Fe  
40 8 8 10 10 1

**Direct**

0.2529312557085850 0.0959582305093463 0.3452518040433074  
0.2518664941123543 0.6046902207244135 0.3352347297673758  
0.7505004641206053 0.0999605563358550 0.3284900159139323  
0.7508498366667375 0.6013574282642051 0.3269505061683260  
0.4025370312385990 0.7509788452900884 0.3234501676840988  
0.4074083941155050 0.2507802381369467 0.3553883665583945  
0.9006565718761426 0.7508621031720973 0.3270733352164171  
0.8980994751491801 0.2508924614021938 0.3283305490385814  
0.2492286665096846 0.7508969305874739 0.1205656513994121  
0.2624190644292268 0.2509807028480980 0.1243363633804861  
0.7530353825712456 0.7508416416662319 0.1176849697481326  
0.7448709639286352 0.2509749991710339 0.1219173732144108  
0.9981134777964606 0.0009673157792777 0.3481076873560427  
0.9981187183585609 0.5011288786914482 0.3481882161537065  
0.5040448778968525 0.9879559807066337 0.3508866038385664  
0.5039824668103355 0.5137876470366698 0.3510868964251063  
0.1002856185094432 0.7509937197309748 0.3282564183826528  
0.0970259251292215 0.2510492508047001 0.3354917307278473  
0.6017063449912624 0.7510479729665078 0.3227892512789934  
0.6060902952178789 0.2509637643633821 0.3463929444457963  
0.2518936401008751 0.8972637425556097 0.3350136525159557  
0.2531405907170053 0.4059739656913063 0.3453348032078219  
0.7510024845279388 0.9005063251221976 0.3267715230886358  
0.7505859543020721 0.4018871067915306 0.3286346930872307  
0.0009858744008577 0.8515922974804501 0.1378571757612698  
0.0000734402381944 0.3510222417596439 0.1409365775573828  
0.5017964986271924 0.8511022402651236 0.1321195438539144  
0.5028932057345892 0.3507298099127925 0.1597037046290561  
0.1523297492443383 0.0013790604312940 0.1482906520801294  
0.1523546493612391 0.5005583115191364 0.1484894486405578  
0.6504721183050048 0.0012067377307319 0.1374578923926797  
0.6504544053051121 0.5005351915074698 0.1376159876417044  
0.3516990734648678 0.0010258076013517 0.1484357838200433  
0.3517049975192374 0.5010655289291788 0.1485281266082034  
0.8509403867067319 0.0013102999405258 0.1365518599165006  
0.8509284153609532 0.5007288050149200 0.1367408176668932

|                    |                    |                    |
|--------------------|--------------------|--------------------|
| 0.0001798074392681 | 0.1510087106900109 | 0.1408599517495889 |
| 0.0011014854876233 | 0.6503977962176938 | 0.1377328397794151 |
| 0.5030747207355571 | 0.1511514218941489 | 0.1595943142810596 |
| 0.5019150455238084 | 0.6507510361932538 | 0.1322991098832144 |
| 0.0011764218416700 | 0.7509604060612800 | 0.2320591856183587 |
| 0.0021800149882528 | 0.2509944408490173 | 0.2376758167200972 |
| 0.5015344429529477 | 0.7509738287686625 | 0.2278185119364300 |
| 0.5020762771936783 | 0.2509045301912598 | 0.2565188970020330 |
| 0.2514532616046851 | 0.0014777537221946 | 0.2464763776572423 |
| 0.2515000840531438 | 0.5005070345483698 | 0.2466315192874901 |
| 0.7513530163527349 | 0.0007516617557619 | 0.2317724186784302 |
| 0.7513298577835785 | 0.5011032846283473 | 0.2319361252311061 |
| 0.0020169301654282 | 0.0018448431396061 | 0.1849782912341005 |
| 0.0020281623509041 | 0.5001681649806904 | 0.1850613022216129 |
| 0.5005791231516759 | 0.9986860197811543 | 0.1881188066530413 |
| 0.5005540921476530 | 0.5031694573028193 | 0.1883004403773935 |
| 0.2506754565727190 | 0.7509636537470478 | 0.2838602233530813 |
| 0.2534179556454650 | 0.2509665497071707 | 0.2904214185001612 |
| 0.7518371447103867 | 0.7509073730468960 | 0.2809000159868331 |
| 0.7515890566744450 | 0.2509328575595739 | 0.2854535751426527 |
| 0.5579327717592943 | 0.3817707179292157 | 0.8506179283423728 |
| 0.4427952898378440 | 0.1203674926213666 | 0.8488492378993566 |
| 0.5941616920357462 | 0.3898021581890759 | 0.7111967836732445 |
| 0.5020610351984450 | 0.3937641007341981 | 0.6246715053960907 |
| 0.4083247516828571 | 0.3881097242233754 | 0.7082433560526137 |
| 0.4418888012601859 | 0.3807091677881256 | 0.8489423135128272 |
| 0.5588452689848074 | 0.1201019427832267 | 0.8505173409137120 |
| 0.5951041519360587 | 0.1123806566884164 | 0.7110802185828295 |
| 0.5030283401575696 | 0.1078156131439000 | 0.6245690072370239 |
| 0.4092625788503961 | 0.1127840052428492 | 0.7081540179669799 |
| 0.6772800199137121 | 0.3897528886158865 | 0.6767269335811722 |
| 0.3902980889855526 | 0.1279963129258209 | 0.9375530683933792 |
| 0.6096574824366919 | 0.1266905900760787 | 0.9407669635357503 |
| 0.6782109344372981 | 0.1130247023905730 | 0.6765802763839039 |
| 0.6087949698190228 | 0.3754366061434227 | 0.9408525426291162 |
| 0.3894606147852680 | 0.3726818569563713 | 0.9376573465345993 |
| 0.5037022908377516 | 0.1079689627826601 | 0.5134306295124115 |
| 0.5027394194194762 | 0.3936591594871527 | 0.5135332032610838 |
| 0.3261110015044939 | 0.3866320918448849 | 0.6704791896011535 |
| 0.3270327096899728 | 0.1136937447478384 | 0.6704092061488678 |
| 0.5017906380391955 | 0.2507617204597581 | 0.7462417673385601 |



G<sub>1</sub>-P-20°

1.0000000000000000  
12.4250515482596473 0.0000000000000000 0.0000000000000000  
0.0000000000000000 12.4250515482596473 0.0000000000000000  
0.0000000000000000 0.0000000000000000 9.7373736593534339

O P V C H Fe  
40 8 8 10 10 1

Direct

0.2539663287074186 0.0937140155598364 0.3427980001325076  
0.2527177195331331 0.6016824264385073 0.3400914077233624  
0.7519028936226877 0.0983438812292582 0.3294885771762797  
0.7521962562332143 0.5984618101945871 0.3270762510499858  
0.4042434306712926 0.7475103080341691 0.3331021261560540  
0.4090824618831678 0.2478088800593542 0.3483083406674526  
0.9025497988388274 0.7479272358830431 0.3276151961443753  
0.9002770421187670 0.2477395460630294 0.3283852373076486  
0.2543607963319174 0.7465170254474162 0.1247096823821847  
0.2603689248067256 0.2503243212068044 0.1217902592683098  
0.7518139990503797 0.7493672133096880 0.1210707402706778  
0.7505218810419626 0.2480124998779084 0.1193899283640568  
0.0010715691445741 0.9982629395422520 0.3481123060093945  
0.9988545704203825 0.4986503251112904 0.3488478945202296  
0.5041971964011643 0.9936234574560956 0.3538181323599622  
0.5082962619663611 0.5025720126346909 0.3551522268814309  
0.1020738701962833 0.7492361513747889 0.3286692038053809  
0.0987445804343596 0.2487023167128340 0.3360491321996356  
0.6041006619128976 0.7491371605383874 0.3325948060943650  
0.6077183550138331 0.2497500806429479 0.3383582697294003  
0.2545537936248372 0.8951514116641606 0.3351760976626883  
0.2547193073066703 0.4025925247097742 0.3473472618964809  
0.7533589202343856 0.8986018927593583 0.3293259202586747  
0.7537674809824125 0.3991109872451821 0.3272242167099769  
0.0020390561996790 0.8488396154533440 0.1378025769156968  
0.0019412049552575 0.3486172513255026 0.1412524040624716  
0.5033859717998302 0.8482394158734978 0.1421109552567041  
0.5038086970903730 0.3484589494830704 0.1521774690677414  
0.1541595582575792 0.9971768984016318 0.1470366849098037  
0.1544898350212907 0.4982868114827403 0.1512661896047652  
0.6519739789685092 0.9983437492635634 0.1398952359351409  
0.6521960792468653 0.4975364706858043 0.1372984543907619  
0.3537853735715598 0.9982422477775958 0.1473056267422290  
0.3539211693726609 0.4997320272072682 0.1532746089073576  
0.8526321876849533 0.9991809990820129 0.1383391308625942  
0.8530147008009537 0.4992500405816481 0.1360080214743289

|                    |                    |                    |
|--------------------|--------------------|--------------------|
| 0.0029303431290597 | 0.1483764241147436 | 0.1407566160459286 |
| 0.0035013677917509 | 0.6478690698865401 | 0.1382218767396806 |
| 0.5045993903743331 | 0.1487749112581482 | 0.1525601189468117 |
| 0.5048616802888106 | 0.6481793485995774 | 0.1425607439771931 |
| 0.0029973578040535 | 0.7484945721274561 | 0.2323523670992239 |
| 0.0042268996399996 | 0.2483313395344265 | 0.2377234592173481 |
| 0.5036333954569332 | 0.7483830505902369 | 0.2379991847377376 |
| 0.5035058406217603 | 0.2486994024898002 | 0.2492094529908895 |
| 0.2534116684243233 | 0.9986140316679033 | 0.2449840771650160 |
| 0.2531533886599867 | 0.4982231322954027 | 0.2501074493566293 |
| 0.7530893066249355 | 0.9985125376236273 | 0.2337341900893658 |
| 0.7533338891836188 | 0.4987251622828298 | 0.2311392344896090 |
| 0.0039433530037043 | 0.9991567880297716 | 0.1849669454413308 |
| 0.0038327480907396 | 0.4976945455892521 | 0.1857825502948403 |
| 0.5023893657287924 | 0.9974004904749052 | 0.1904518443149245 |
| 0.5028908834737769 | 0.4994143856328965 | 0.1918303430683830 |
| 0.2529530362674159 | 0.7481486779174175 | 0.2879822868862923 |
| 0.2542776390253165 | 0.2482810697947224 | 0.2880627186457645 |
| 0.7533843341617095 | 0.7487275791080397 | 0.2842778856217361 |
| 0.7542855402695867 | 0.2488018490750320 | 0.2830436289785923 |
| 0.5090788738697013 | 0.4047146847387154 | 0.8308515070423128 |
| 0.4812795338173104 | 0.1126770539360404 | 0.8339283674451969 |
| 0.5181402752903911 | 0.4190147648903734 | 0.6848415585579770 |
| 0.4191960121275675 | 0.3858730849339982 | 0.6239980708684937 |
| 0.3494690007030050 | 0.3497947936417791 | 0.7301458505281725 |
| 0.4038712834843479 | 0.3613515143229526 | 0.8587522563348389 |
| 0.5886160946252703 | 0.1539690802415020 | 0.8508901305425339 |
| 0.6354213073505671 | 0.1643803299493885 | 0.7175498516238320 |
| 0.5586581365624566 | 0.1298426789147516 | 0.6188818748145706 |
| 0.4629588616003207 | 0.0984673670214787 | 0.6893040216798717 |
| 0.5878624307253578 | 0.4485858271480915 | 0.6291639691607680 |
| 0.4233083918102799 | 0.0984412131118165 | 0.9153971510218514 |
| 0.6262957622219828 | 0.1758111343212332 | 0.9474636835644488 |
| 0.7146841195591693 | 0.1968375395035812 | 0.6951874024847881 |
| 0.5718612525934493 | 0.4208979149236829 | 0.9057175283736697 |
| 0.3720367663316901 | 0.3384104932706862 | 0.9584349669127447 |
| 0.5691820768849062 | 0.1328213232978369 | 0.5085692001527055 |
| 0.4021758199795868 | 0.3824403261529141 | 0.5148592848503645 |
| 0.2697749337825348 | 0.3156958995899954 | 0.7157912005188446 |
| 0.3895763035287553 | 0.0701373759890741 | 0.6406843358332679 |
| 0.4931285716835724 | 0.2582801616943141 | 0.7389865106813293 |

$S_{\parallel}$ -P-0°

1.0000000000000000  
12.4250515482596473 0.0000000000000000 0.0000000000000000  
0.0000000000000000 12.4250515482596473 0.0000000000000000  
0.0000000000000000 0.0000000000000000 10.8465968913686392

O P V C H Fe  
40 8 8 10 10 1

Direct

0.2517348569256568 0.0960943643243603 0.3069300710153664  
0.2513156448274341 0.6037864855216891 0.3005349601851109  
0.7512921374563643 0.0997454546642268 0.2917193884905628  
0.7514179883966590 0.6005782692470524 0.2924042638593446  
0.4021615366993960 0.7506318325823864 0.2971042423269954  
0.4062093901108753 0.2504947464423814 0.3066330482331393  
0.9007170975104392 0.7506141690609028 0.2898545124366378  
0.8981031836179988 0.2504020654750324 0.2939390059171801  
0.2536304613719655 0.7501478441676199 0.1087591337643865  
0.2545301123988713 0.2505943741186842 0.1054289440399934  
0.7488590403686283 0.7501969998288429 0.1055805140277059  
0.7507573912655456 0.2505548674545837 0.1041628345638211  
0.9977118686110958 0.9990433076922609 0.3099324177908789  
0.9975760997070128 0.5019057046438760 0.3101704879521069  
0.5040641354622052 0.9975193002363447 0.3164170769815108  
0.5042710286588864 0.5037804984833363 0.3172729150423066  
0.1000826083702998 0.7504607239650433 0.2909024339688228  
0.0963890191104309 0.2501931707564506 0.3006886802658651  
0.6020441370790385 0.7504767179186087 0.2958109501630600  
0.6062302831020204 0.2502218976496526 0.2991939301160561  
0.2512747480985518 0.8971786714138917 0.2999112827653114  
0.2513518899280914 0.4047234981762560 0.3073469126259382  
0.7511432721109775 0.9002865877057784 0.2920559474078102  
0.7511611989744761 0.4010306000089416 0.2918635570918819  
0.0010325093609626 0.8509259495303642 0.1195040407978569  
0.0001224548878895 0.3505195734401687 0.1254628379395220  
0.5015011612689970 0.8507141782235305 0.1255267024987794  
0.5030877191224136 0.3511333395635139 0.1344116815991658  
0.1521559156963498 0.0000018625880639 0.1307294003035872  
0.1521912293752161 0.5011675135512728 0.1311932135732872  
0.6500300697542025 0.9999585522276245 0.1217550161297986  
0.6500145474704438 0.5012562014157240 0.1221444830513342  
0.3517200960331303 0.0000037630848550 0.1320677187303886  
0.3517676157898931 0.5009029853795602 0.1328727258930874  
0.8507396015871338 0.9998064138859064 0.1198814835161949  
0.8507188543017677 0.5009293141191595 0.1200829510074740  
0.9999162865226394 0.1504247567081192 0.1252208488696238

0.0008672546595906 0.6499759344821358 0.1196258242876629  
0.5028701993473391 0.1502602182083184 0.1337425413836795  
0.5013775522616979 0.6503044144369526 0.1257610614653218  
0.0010857351191699 0.7504866893511903 0.2042848811921493  
0.0019133228924430 0.2503855247268310 0.2124238457912989  
0.5013248087183211 0.7505875622872628 0.2110792458066017  
0.5017679795044336 0.2504782729085328 0.2200841334414160  
0.2511358257639033 0.0009066779966870 0.2192929474458305  
0.2510605137295043 0.5000514703152302 0.2199230855428675  
0.7512469035062874 0.0000193635958370 0.2057454273954227  
0.7512844534018841 0.5008614031992652 0.2060336949181024  
0.0018026798020492 0.0010309467868856 0.1635223324272271  
0.0018091568042936 0.4998808877283349 0.1637733016880339  
0.5004995652865144 0.0003574051755542 0.1697287761096832  
0.5005113374114764 0.5009368804140625 0.1706328565668669  
0.2511529419677259 0.7504117673257716 0.2553452423043549  
0.2515615149278728 0.2504646695897775 0.2547027651963275  
0.7512358865655868 0.7503858019631866 0.2520769468348089  
0.7524520855337531 0.2504308130052716 0.2509991401622161  
0.5376885361053128 0.1518139758248936 0.8653262643151087  
0.6091857512246071 0.2416671511032742 0.8652032281174491  
0.5464497731253153 0.3370165665127323 0.8735036453627577  
0.4356353292836309 0.3070918130514845 0.8802143727677971  
0.4297325798157557 0.1920262180213209 0.8756737427817582  
0.4490823844507618 0.1595230399854907 0.5593131808077889  
0.5599789859568951 0.1883688279945497 0.5526422182880504  
0.5670139826765653 0.3036757869894255 0.5573774976475903  
0.4597143989177737 0.3450181003075936 0.5672961742387125  
0.3876592846183897 0.2556958905258070 0.5692527611011960  
0.6961280234030588 0.2382417372410640 0.8562227090396956  
0.4171827680115922 0.0782062354947471 0.5598997557030334  
0.6268900590583717 0.1325758615045916 0.5445948486800547  
0.5617229498318080 0.0679451652052047 0.8587590992810773  
0.3566572008465950 0.1444378993353054 0.8817930803953259  
0.6401526398869024 0.3513172527824838 0.5520086231842732  
0.5780970852463132 0.4184930597338889 0.8716609776861279  
0.3677143017842315 0.3615793549755356 0.8885261003181385  
0.4370911827892171 0.4292798688276917 0.5726568407142753  
0.3008601676735386 0.2601632757511764 0.5799734568901157  
0.4985320357555434 0.2479981480785800 0.7165979667779219

**E<sub>II</sub>-P-0°**

1.00000000000000

12.4250515482596473 0.0000000000000000 0.0000000000000000  
0.0000000000000000 12.4250515482596473 0.0000000000000000  
0.0000000000000000 0.0000000000000000 10.8465968913686392

O P V C H Fe  
40 8 8 10 10 1

Direct

0.2507756522105532 0.0951412364019559 0.3085733491366527  
0.2503158217384843 0.6028276844321434 0.3013960458422584  
0.7492476712896471 0.0988227978185379 0.2964112193149447  
0.7498853500314356 0.5997536553316467 0.2962915000432591  
0.4009811413148692 0.7494510892778913 0.2980352812864855  
0.4041331502750197 0.2501088439222927 0.3074986481554800  
0.8994197086967153 0.7496883217572552 0.2959567121544734  
0.8965772178883848 0.2494818321155022 0.2997959851922179  
0.2504189250652276 0.7499242440556004 0.1110789659643572  
0.2502577794053952 0.2490270421986140 0.1071887477702243  
0.7495886473288474 0.7495517619936611 0.1095365753052934  
0.7503915228657378 0.2494176024386250 0.1089041299701051  
0.9977322094310523 0.9981651257153453 0.3148519197502646  
0.9980551082066025 0.5010688167917832 0.3145661527282423  
0.5021458798770376 0.9953994682789504 0.3191005416182958  
0.5018860072606118 0.5030568336174542 0.3179851979906156  
0.0989767009460318 0.7496272124412960 0.2961197797581883  
0.0951242325653284 0.2494446853923991 0.3059715260727852  
0.6006551059749503 0.7493206892872217 0.2977284121587234  
0.6042393810771781 0.2499754342627912 0.3022395630775965  
0.2503894147786755 0.8962840778229769 0.3022857445533926  
0.2500540822926997 0.4039918760623629 0.3076937531152494  
0.7496137013971514 0.8993375080541606 0.2964438108233151  
0.7497370782896184 0.4002979136063161 0.2961604310470411  
0.9991393286979496 0.8500211514753517 0.1251571681038779  
0.9984346573926348 0.3494867696154878 0.1309785620745668  
0.5008750952165475 0.8496742721974330 0.1269928685479104  
0.5020777394020183 0.3497744064717651 0.1354537879178282  
0.1506929507912445 0.9986707835734289 0.1332697066929204  
0.1505603891018692 0.5006854895813803 0.1322932275339667  
0.6491694907132719 0.9988571740876717 0.1255140873974827  
0.6492615706098545 0.5001705393833167 0.1254234090764945  
0.3505093743823055 0.9985265267176469 0.1338439533228563  
0.3504173379204543 0.5002769176116952 0.1331015158041761  
0.8496749368239479 0.9991909971765885 0.1249748930112216  
0.8497845377050360 0.5000463728429104 0.1246701124552062  
0.9984119336720210 0.1496034897522713 0.1309464694334479  
0.9990719813511043 0.6493403064589403 0.1251003329694456

0.5020080748409850 0.1487832161578382 0.1369556090588394  
0.5007255262303799 0.6493476549832183 0.1266431008740236  
0.9996034010327486 0.7496485294605454 0.2099782517628449  
0.0003065787621347 0.2495434766935782 0.2181036507873619  
0.5003474404458638 0.7493691223486685 0.2124023793950975  
0.5004267533893001 0.2497855180200788 0.2221098017613864  
0.2500100618937423 0.9997334744729868 0.2212540527052153  
0.2498924324962192 0.4993630849370946 0.2203627026721431  
0.7499090546117113 0.9991787167664060 0.2103069487015338  
0.7500162390397458 0.4999440884819507 0.2100777882211222  
0.0006819209348120 0.0001595927561357 0.1683943216932256  
0.0007182222286330 0.4990902062763382 0.1680959270899030  
0.4993443220806671 0.9988590192367266 0.1724441419734044  
0.4992936672459179 0.4998174945913291 0.1713463335444881  
0.2496636332430547 0.7495795209968902 0.2576963838739916  
0.2494436433880409 0.2495159059446700 0.2565060700531699  
0.7503012691106147 0.7494991356757120 0.2560747631882359  
0.7509920166515707 0.2495858827437297 0.2557095702582855  
0.5534073818110856 0.1680881822922963 0.8779327964967024  
0.5918725883794870 0.2763848246469174 0.8723108277524763  
0.4996221542227961 0.3461342570237906 0.8702945626982449  
0.4051988839772025 0.2800783542610934 0.8765409412946120  
0.4388712858898271 0.1707780753808512 0.8807899415739762  
0.5529801656968606 0.1687927479828269 0.5595752255579288  
0.5898806826033641 0.2777677759814130 0.5661524894345390  
0.4970254027859251 0.3465226596277370 0.5683217478690077  
0.4037148880005634 0.2788947175630475 0.5649403584575038  
0.4386758101020631 0.1698530851213840 0.5585377237393524  
0.6755981444664864 0.3012241673729060 0.8714748808210711  
0.6034384069738395 0.0974256490355378 0.5576211035993917  
0.6732088930039135 0.3040679595586094 0.5676951932355381  
0.6032420286603604 0.0962337651131843 0.8783267425039621  
0.3856491677299552 0.1014192143666978 0.8821420298689293  
0.4973388584340253 0.4338381064395765 0.5701282213580809  
0.5011306980325247 0.4334464647812854 0.8660406941569009  
0.3224050807277641 0.3079042021154748 0.8772265401697932  
0.3207356594332567 0.3062520476343494 0.5674362395841289  
0.3868312311526438 0.0995111721080657 0.5566983612780743  
0.4980506223024387 0.2485606490264137 0.7195631037646800

**E<sub>||</sub>-P-45°**

1.0000000000000000

12.4250515482596473 0.0000000000000000 0.0000000000000000

0.0000000000000000 12.4250515482596473 0.0000000000000000  
0.0000000000000000 0.0000000000000000 10.8465968913686392

O P V C H Fe  
40 8 8 10 10 1

Direct

0.2505869534504639 0.0952687704886485 0.3086087005896513  
0.2503166290065690 0.6030241525984272 0.3013485877836924  
0.7493253714772143 0.0991277235534619 0.2962392225317219  
0.7496004261702954 0.5998560751388693 0.2961884060480205  
0.4009303126154163 0.7497151988925327 0.2978323364753893  
0.4043105421708887 0.2502114166559242 0.3079221156581341  
0.8993806669095604 0.7496676897076545 0.2960127514061862  
0.8966553514139588 0.2496804118143637 0.3000881408409045  
0.2502290299911137 0.7500589628737595 0.1109489975905366  
0.2506117001044659 0.2491696951638664 0.1071579446397286  
0.7497371851993289 0.7496640712856683 0.1096261836058176  
0.7511309722690334 0.2498051735882878 0.1085920182030373  
0.9978050197544072 0.9982213500478067 0.3151068134527347  
0.9981340380083520 0.5010681043953855 0.3147657878952516  
0.5018660276536155 0.9952779816976066 0.3190913727786333  
0.5015697442869503 0.5031415303312246 0.3181433479389232  
0.0989489193208686 0.7496368868569191 0.2961851074129675  
0.0952167900871898 0.2496207835618594 0.3059626852928108  
0.6005641185048733 0.7496150472476444 0.2976483967041300  
0.6044083602095669 0.2500917527957398 0.3016906465144123  
0.2501433247061266 0.8963591074985841 0.3022657346457728  
0.2502554831470083 0.4042533802429669 0.3077391421394483  
0.7496045509192201 0.8995494570495083 0.2963260758375894  
0.7495678422439706 0.4004511724210008 0.2961218737580765  
0.9990888769953485 0.8500766786786980 0.1253010502585594  
0.9983881672418145 0.3495904386776748 0.1310485021365343  
0.5008544952325809 0.8498391277110140 0.1267458654555490  
0.5016973816749170 0.3500470729487996 0.1355124509367316  
0.1505512861066002 0.9988808878659864 0.1332551104573179  
0.1504737412492497 0.5006769838810055 0.1323267607009039  
0.6490090300677245 0.9991657413483529 0.1255583100367028  
0.6491409963128794 0.5001937835555353 0.1252586063495784  
0.3504148540673465 0.9986965140368146 0.1339055524358405  
0.3503385948000625 0.5004829587524515 0.1328429345161831  
0.8496361702758544 0.9993254189993352 0.1249475310070392  
0.8497368502505611 0.5001869807715090 0.1247627782671689  
0.9983443353262600 0.1496713319832361 0.1311326523214659  
0.9990844786921304 0.6493826449506284 0.1251601511456750  
0.5016169525769876 0.1489375654721196 0.1368149299997901

0.5007432398643192 0.6494744612230418 0.1266842315393700  
0.9996011663219799 0.7496678457163163 0.2100600081305689  
0.0003561251084246 0.2496673415054742 0.2182316561941358  
0.5003072087993247 0.7496055417985193 0.2122496276714230  
0.5002800276404390 0.2499085765937061 0.2220317680991163  
0.2498940197488389 0.9998660994253700 0.2213048814445247  
0.2498772577744371 0.4995382174017469 0.2203166731009406  
0.7498017812490092 0.9994054666148913 0.2101950843272424  
0.7498762927352538 0.5000762195596942 0.2099605138119497  
0.0005982330054245 0.0002404116929694 0.1686272267151534  
0.0006677515067676 0.4991133439955281 0.1682786473098012  
0.4991096966283365 0.9990358865992068 0.1724278966759593  
0.4990835605563204 0.5000139270817986 0.1714885821790400  
0.2496035412314481 0.7497460573133654 0.2575757422991419  
0.2495588286588298 0.2497064747622801 0.2564635633172952  
0.7502636335347435 0.7496939079891013 0.2561598002664201  
0.7511685362519984 0.2498475865037260 0.2554483134641333  
0.5938429373049742 0.2349756718737475 0.8779496437251947  
0.5387097130372278 0.3358143987047237 0.8734916388489774  
0.4249913664496456 0.3140971329901963 0.8724069529429568  
0.4112757217792493 0.1997380363999055 0.8755514005614617  
0.5153426535781341 0.1517357012649745 0.8782866307946130  
0.5942915793221478 0.2378129570421054 0.5616962086838038  
0.5378444378063911 0.3379799889023980 0.5663482045773996  
0.4246646473837702 0.3144918537026640 0.5676058641478825  
0.4127809191185373 0.1997134455831133 0.5633062315438671  
0.5173696778042921 0.1531606187313932 0.5590342976870262  
0.5767117246023830 0.4145062568650391 0.8727127932006297  
0.6810976500418154 0.2276164975436312 0.5637570725610077  
0.5742240902558439 0.4174109986472777 0.5669993097604027  
0.6804445661027307 0.2237369274682583 0.8786518382287168  
0.5325404221775596 0.0660195805770898 0.8753113953025935  
0.3598719791503043 0.3731249015027684 0.5679940595133969  
0.3607514138363619 0.3732982240660940 0.8723878171064415  
0.3349165214794754 0.1572957213348236 0.8751692381614432  
0.3374335669891291 0.1553971712874473 0.5637078328232641  
0.5354289262792835 0.0676753213893221 0.5580545836746292  
0.4966441593940770 0.2495737608054526 0.7196328498394490



### The Total Energy comparison.

**Table S2.** The relative total energy of 17 different configurations. The reference is  $E_{\perp}$ -V-45°. Unit in eV.

| V/VO               | 0°     | 45°    |
|--------------------|--------|--------|
| $E_{\perp}$ -VO    | +0.063 | +0.065 |
| $E_{\perp}$ -V     | +0.176 | 0      |
| $S_{\perp}$ -V     | +0.061 | +0.050 |
| $E_{\parallel}$ -V | +0.538 | +0.537 |
| $S_{\parallel}$ -V |        | +0.558 |
| P/P                | 0°     | 45°    |
| S-P                | +0.084 | +0.082 |
| E-P <sub>VO</sub>  | +0.208 |        |
| E-P <sub>V</sub>   | +0.122 | +0.084 |
| $E_{\parallel}$ -V | +0.612 | +0.625 |
| $S_{\parallel}$ -V |        | +0.617 |

### The comparison of Gibbs Free Energy of $E_{\perp}$ -V-45° and $S_{\perp}$ -V-45°

The vibrational calculations are conducted using the IBRION=6 setting in the INCAR file. Subsequently, frequency information is extracted utilizing the function 501 in VASPKIT.<sup>1</sup>

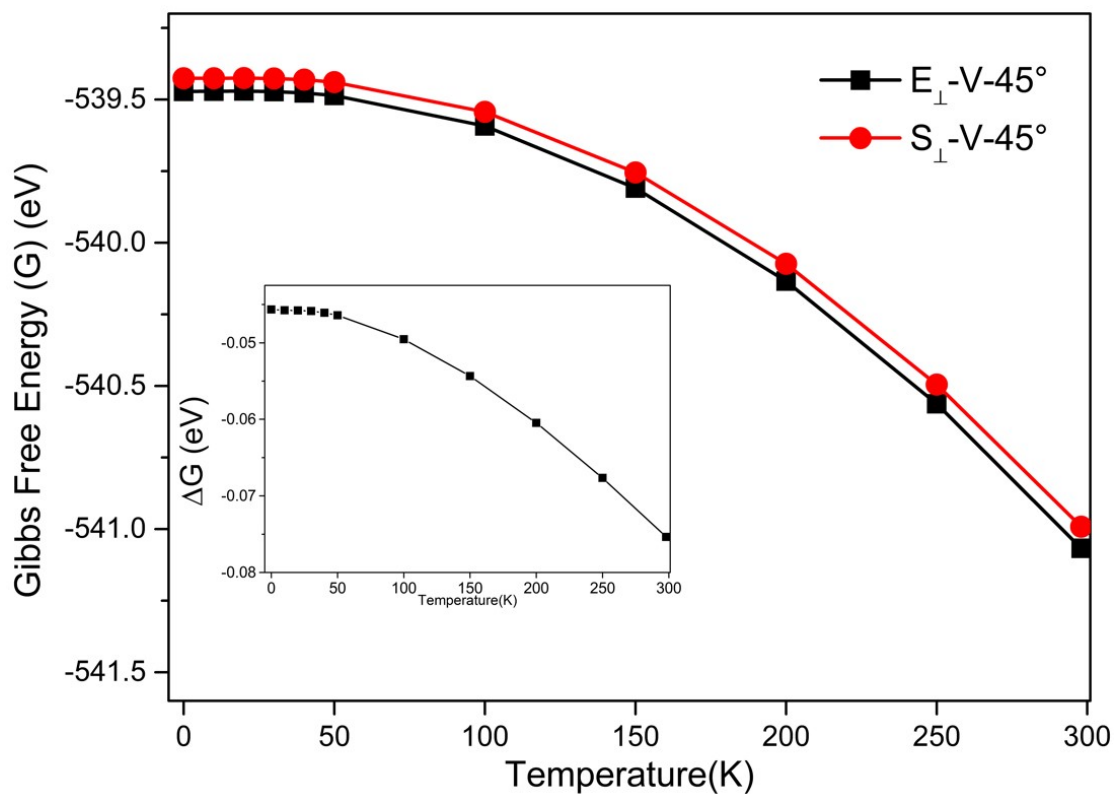

**Figure S3.** The Gibbs Free Energy variations as a function of temperature for the  $E_{\perp}$ -V-45° (in black) and  $S_{\perp}$ -V-45° (in red) configurations. An inset detail provides a focused comparison of the differential Gibbs Free Energy between these configurations across varying temperatures.

### The Bader Charge Analysis.

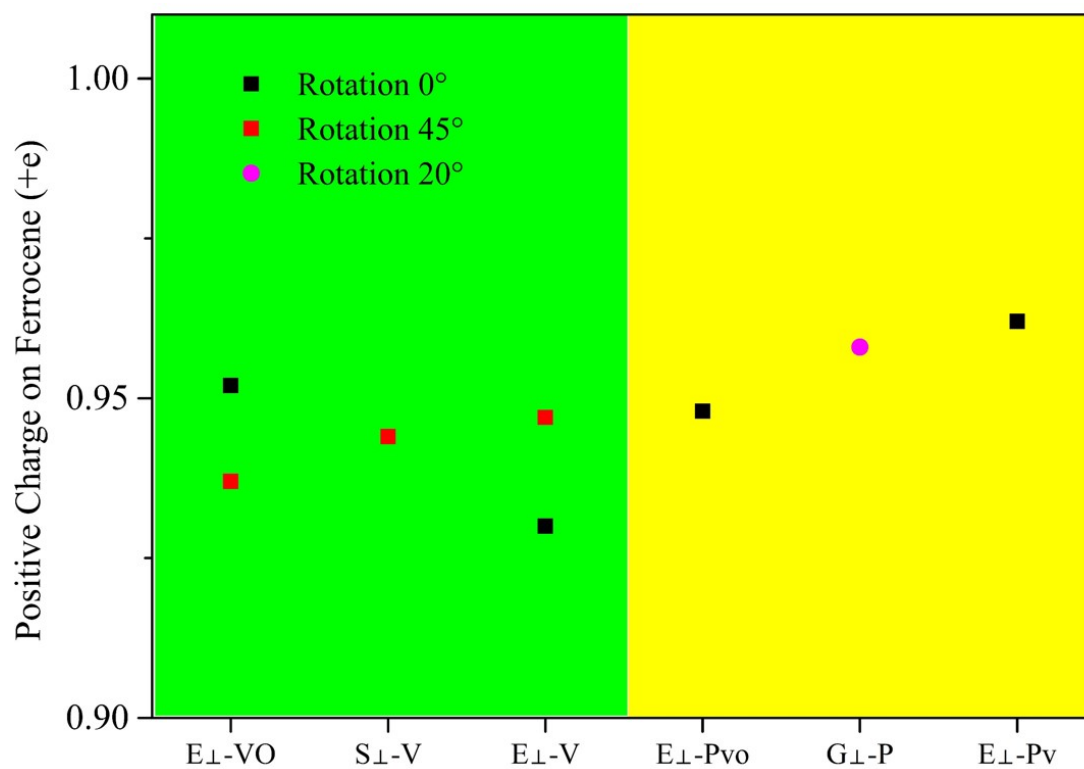

**Figure S4.** Bader charges analysis of eight unique configurations and compared them with experimental data.<sup>2</sup> The green region means the ferrocene located on V/VO site, while yellow region means the ferrocene located on P/P site.

The charge density difference maps of eight different configurations.

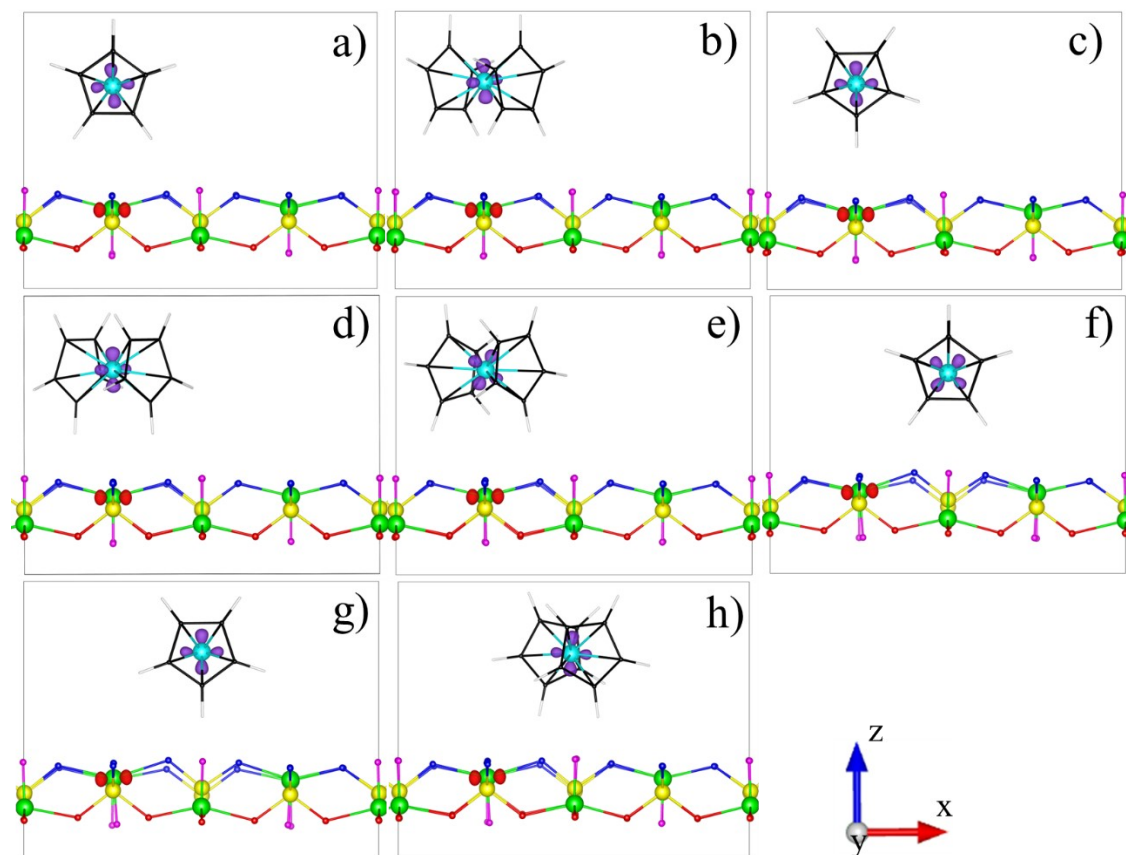

**Figure S5.** The charge density maps of a)  $E_{\perp}$ -VO- $0^{\circ}$ , b)  $E_{\perp}$ -VO- $45^{\circ}$ , c)  $E_{\perp}$ -V- $0^{\circ}$ , d)  $E_{\perp}$ -V- $45^{\circ}$ , e)  $S_{\perp}$ -V- $45^{\circ}$ , f)  $E_{\perp}$ -P<sub>VO</sub>- $0^{\circ}$ , g)  $E_{\perp}$ -P<sub>V</sub>- $0^{\circ}$ , and h)  $G_{\perp}$ -P- $20^{\circ}$ . The red region means the charge accumulation, while the violet region means the charge reduction. The issovalue is  $0.04 \text{ e}/\text{\AA}^3$ . All of pictures viewed along  $[010]$  direction. The black box is the unit cell.

**The charge density difference when ferrocene intercalated on P/P site.**

When ferrocene is intercalated at the P/P site, four possible sites for charge accumulation on the vanadium are observed. These sites are labeled as V\_Top, V\_Bottom, V\_Left, and V\_Right, as illustrated in Figure S3. From a symmetry perspective, V\_Top is equivalent to V\_Bottom, while V\_Left is equivalent to V\_Right.

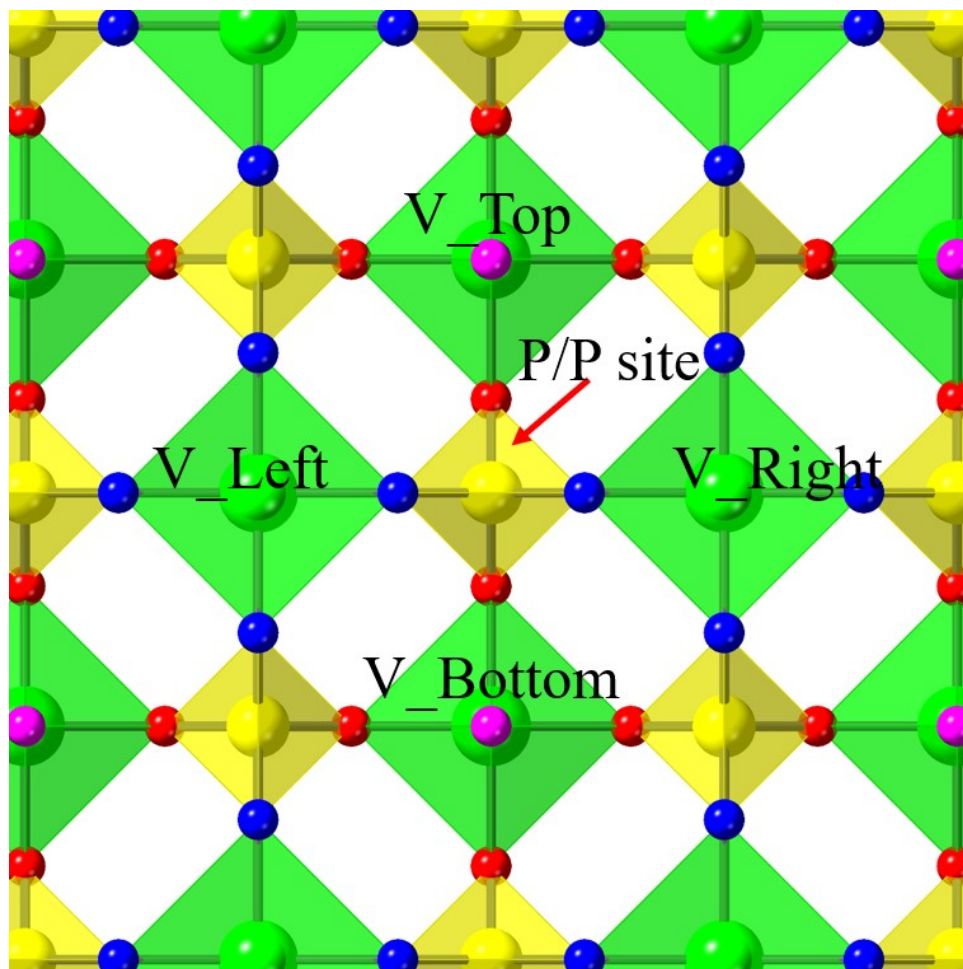

**Figure S6.** The four possible charge accumulations of vanadium.

**Table S3.** The Relative total energy of four possible charge accumulation of vanadium. The reference is the charge accumulation on the left. Unit in eV.

| <b>Charge Accumulation</b> | <b>Relative total energy (eV)</b> |
|----------------------------|-----------------------------------|
| <b>V_Left</b>              | 0                                 |
| <b>V_Right</b>             | +0.003                            |
| <b>V_Top</b>               | +0.040                            |
| <b>V_Bottom</b>            | +0.041                            |

The 2D charge density difference map of  $G_{\perp}$ -P-20° along [001] direction.

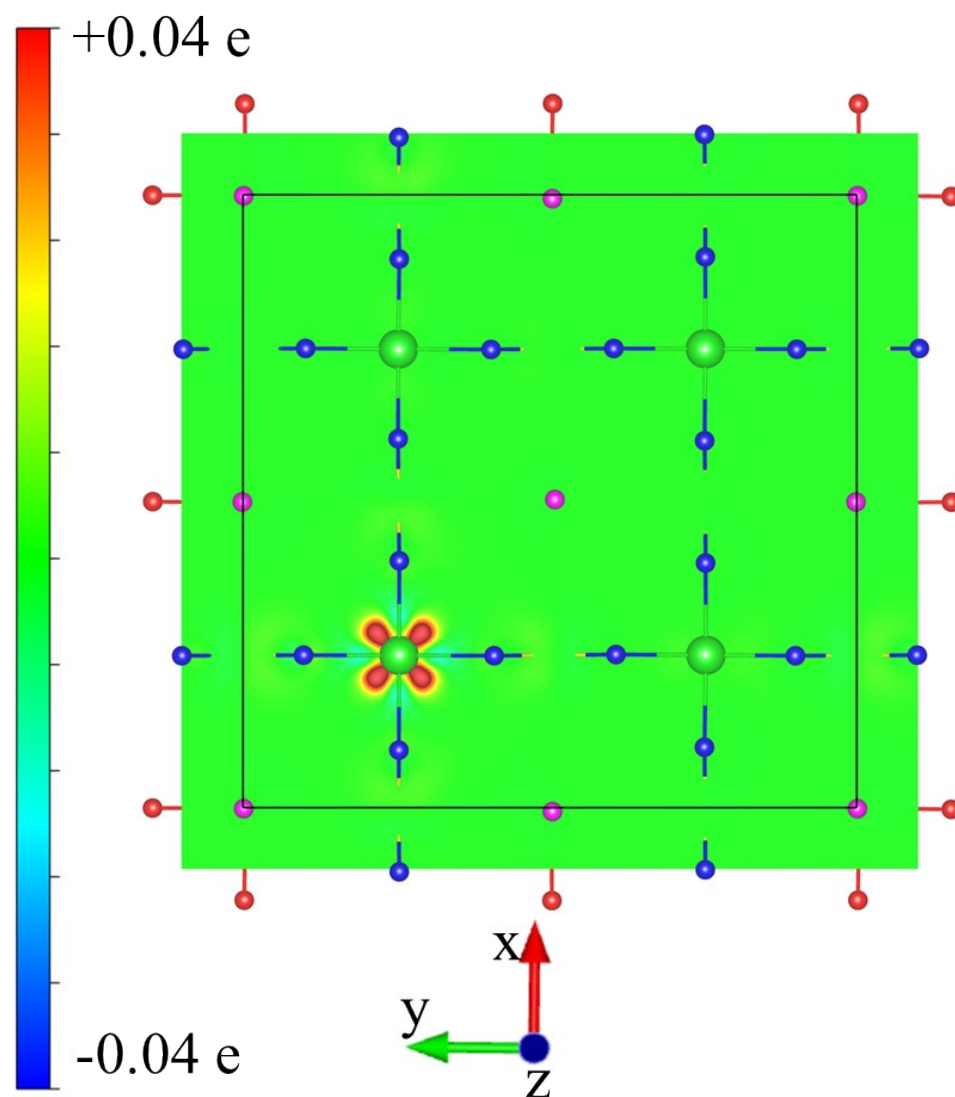

**Figure S7.** The charge density difference map built by the four vanadium atoms, viewed along [001] direction; the ferrocene has been omitted due to the clarity. The red region means the charge accumulation. The black box indicated the unit cell. The iso-value is  $0.04 \text{ e}/\text{\AA}^3$ .

**The dihedral angle of ferrocene with and without D3 calculations.**

**Table S4.** The dihedral angle of ferrocene with and without D3 calculations.

| <b>Dihedral Angle (°)</b>             | <b>With D3</b> | <b>Without D3</b> |
|---------------------------------------|----------------|-------------------|
| <b>E<sub>1</sub>-VO-0° Ferrocene</b>  | 2.98           | 2.99              |
| <b>E<sub>1</sub>-VO-45° Ferrocene</b> | 2.34           | 2.77              |
| <b>E<sub>1</sub>-V-0° Ferrocene</b>   | 13.49          | 13.78             |
| <b>E<sub>1</sub>-V-45° Ferrocene</b>  | 12.04          | 12.54             |



### The charge density difference of supercell structure.

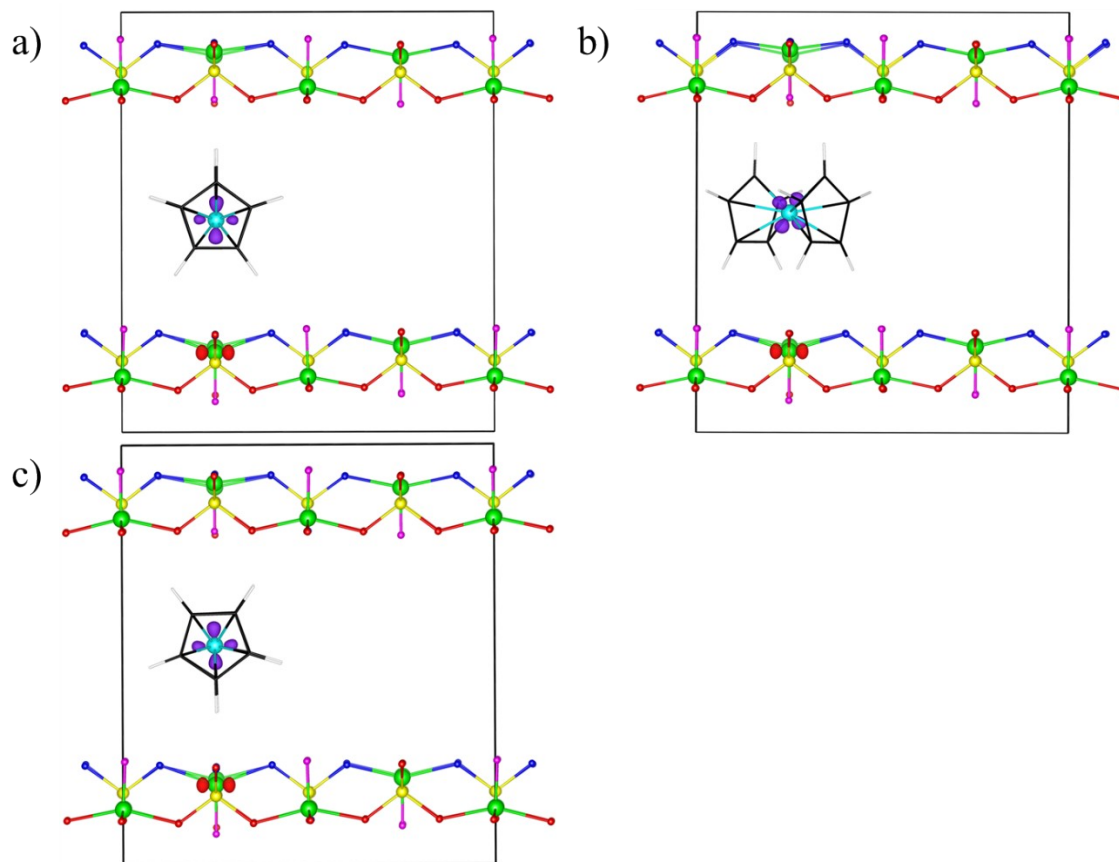

**Figure S8.** The charge density difference map of a)  $E_{\perp}$ -VO- $0^{\circ}$  configuration, b)  $E_{\perp}$ -VO- $45^{\circ}$  and c)  $E_{\perp}$ -V- $0^{\circ}$ , the violet region is the charge reduction and red region is the charge accumulation, the iso-value is  $0.04 \text{ e}/\text{\AA}^3$ , viewed along [010] direction. The black box is the supercell structure.

**The Hirshfeld surface analysis.**

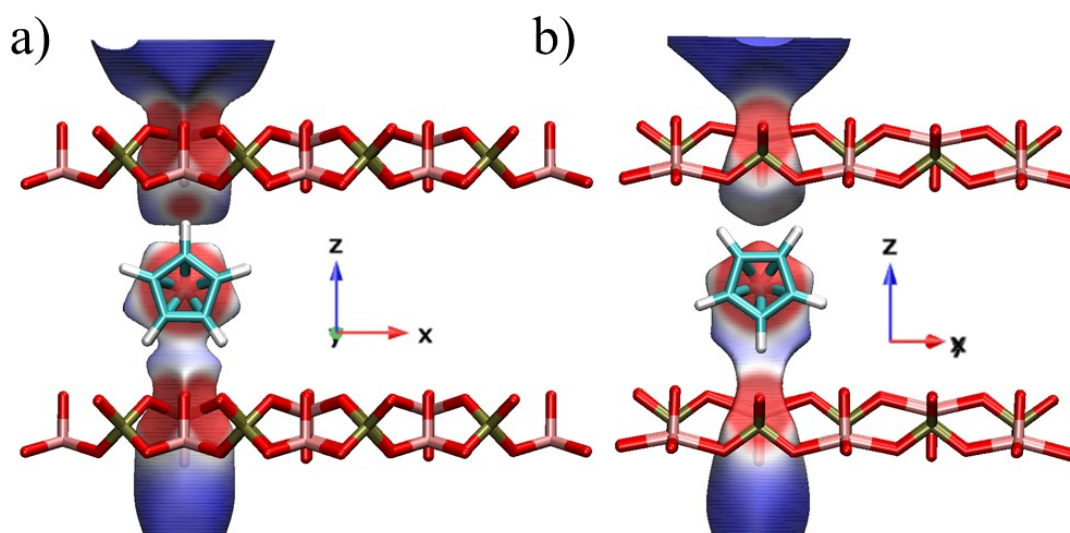

**Figure S9.** The Hirshfeld surface analysis of a)  $E_{\perp}$ -VO-45°, viewed along [010] direction, and b)  $E_{\perp}$ -V-0°, viewed along [-110] direction. Red means high electron density, white means medium electron density and blue means low electron density

**The other orientation of Hirshfeld surface analysis.**

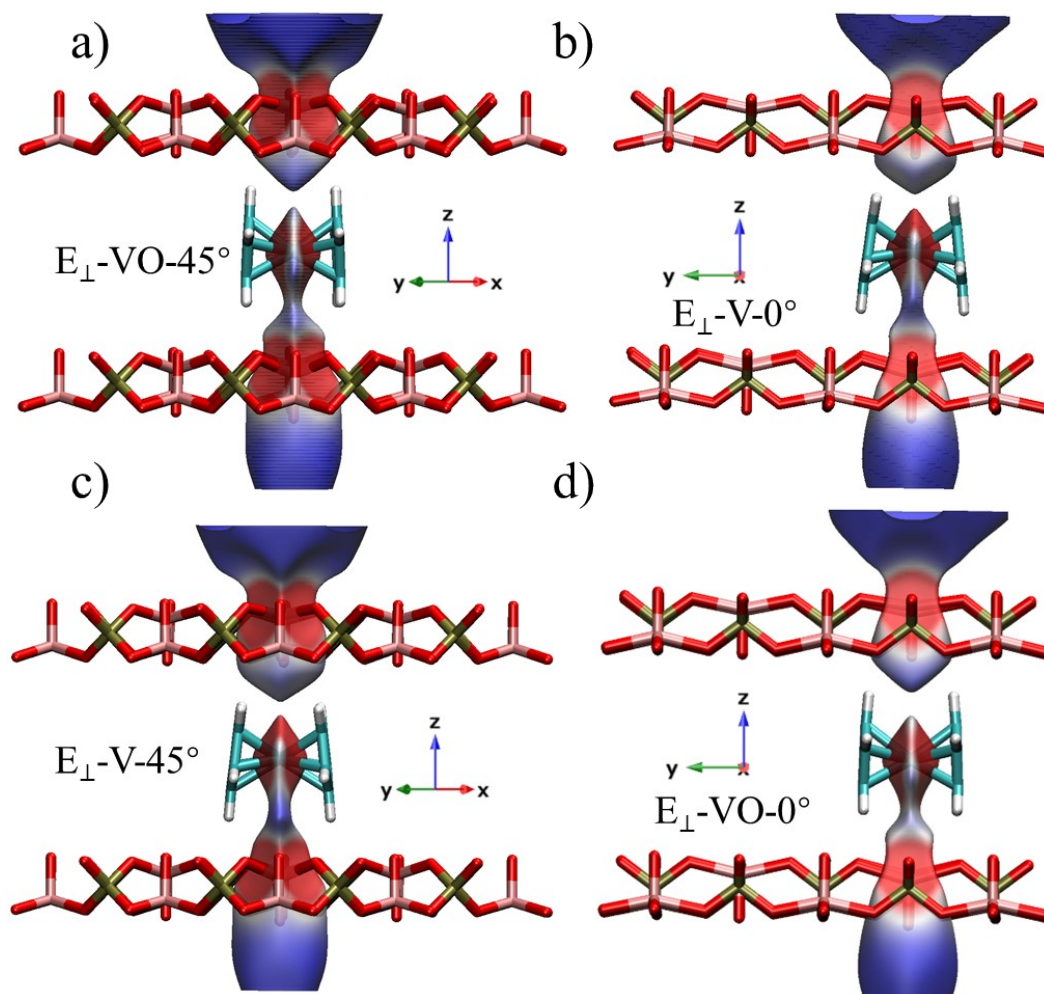

**Figure S10.** The Hirshfeld surface analysis of a)  $E_{\perp}$ -VO-45°, viewed along [110] direction, b)  $E_{\perp}$ -V-0°, viewed along [100] direction, c)  $E_{\perp}$ -V-45°, viewed along [110] direction, and d)  $E_{\perp}$ -VO-0°, viewed along [100] direction.

## Reference.

- 1 V. Wang, N. Xu, J.-C. Liu, G. Tang and W.-T. Geng, *Comput. Phys. Commun.*, 2021, **267**, 108033.
- 2 A. Davidson, G. Villeneuve, L. Fournes and H. Smith, *Mater. Res. Bull.*, 1992, **27**, 357–366.
